# Supplementary material
Source: publisher site journal article supplement (https://www.dovepress.com/article/601386)
Supplement: Supplementary file 1 [file 601386%20Revised%20supplementary.pdf]

## Supplementary Table S1. CREDES checklist for Reporting Delphi studies

### Delphi studies in social and health sciences – recommendations for an interdisciplinary standardized reporting (DELPHISTAR).

From: Niederberger, M., Schifano, J., Deckert, S., Hirt, J., Homberg, A., Köberich, S., Kuhn, R., Rommel, A., Sonnberger, M. & the DEWISS network (2024). Delphi studies in social and health sciences—Recommendations for an interdisciplinary standardized reporting (DELPHISTAR). Results of a Delphi study. *PLoS ONE* 19(8): e0304651. <https://doi.org/10.1371/journal.pone.0304651>

More information under OSF (<https://osf.io/gc4jk>) and DEWISS (<https://delphi.ph-gmuend.de/>)

#### What is the aim of DELPHISTAR?

- Improve, harmonize, and make the reporting in publications on Delphi studies comparable
- Facilitate the evaluation of Delphi studies including during peer review processes
- Reduce, and ideally prevent, inconsistencies and unclear descriptions in publications on Delphi studies
- Raise awareness of the diversity among the Delphi variants and of their specific potentials and challenges

#### DELPHISTAR is a Delphi reporting guideline that is:

- valid for all Delphi variants (e.g., classic Delphi, real-time Delphi, group Delphi, policy Delphi, argumentative Delphi, café Delphi)
- applicable to different purposes (e.g., Delphi studies to establish consensus, to gather expert judgments or to forecast)
- given equal consideration in the health and social sciences

**This reporting guideline is meant for studies using Delphi techniques in the health and social sciences.** These also include all Delphi variants and modifications that meet the following criteria:

1. Survey of several people (=experts) with specialized knowledge (e.g., operational knowledge, experiential knowledge, functional knowledge, contextual knowledge)
2. Structured communication process
3. Carrying out at least two survey rounds or the option to respond at least two times
4. Feedback: the (interim) results are presented to the experts starting from the second round
5. Basis is a quantitative questionnaire with the possibility to contribute or supplement arguments for the respective position
6. Quantitative and qualitative answer are systematically analyzed (quantitative: e.g., descriptive statistics, qualitative: e.g., thematic analysis)

This reporting guideline is available in English and German at <https://delphi.ph-gmuend.de/activities/delphistar> (last update October 2024).

#### Contact

Prof. Dr. Marlen Niederberger

E-mail: [marlen.niederberger@ph-gmuend.de](mailto:marlen.niederberger@ph-gmuend.de)

Department of Research Methods in Health Promotion and Prevention

Institute for Health Sciences, University of Education Schwäbisch Gmünd,

Oberbettringer Straße 200, 73525 Schwäbisch Gmünd, Germany

**Table S1** Checklist for Reporting Delphi studies

| Topic                   | Section | Item | Checklist Item                                   | Reported on Page No. | Exemplary wording                                                |
|-------------------------|---------|------|--------------------------------------------------|----------------------|------------------------------------------------------------------|
| I<br>Title and Abstract |         | 1    | Identification as a Delphi study in the title    | 1                    | What is a public health intervention? Results of a Delphi study. |
|                         |         | 2    | Identification as a Delphi study in the abstract | 1-2                  | A Delphi study was selected to answer the research question.     |
|                         |         | 3    | Structured abstract                              | 1-2                  | e.g., background, method, results and discussion                 |

**Supplementary Table S1. CREDES checklist for Reporting Delphi studies**

| Topic         | Section                          | Item | Checklist Item                                                                                                                                       | Reported on Page No. | Exemplary wording                                                                                                                                                                         |
|---------------|----------------------------------|------|------------------------------------------------------------------------------------------------------------------------------------------------------|----------------------|-------------------------------------------------------------------------------------------------------------------------------------------------------------------------------------------|
| II<br>Context | Formal                           | 4    | Information about the sources of funding                                                                                                             | 23                   | The Delphi study was funded by [SOURCE].                                                                                                                                                  |
|               |                                  | 5    | Information about the team of authors and/or researchers (e.g., discipline, institution)                                                             | 1, 8                 | The Delphi study was conducted by an interdisciplinary team with representatives from medicine, public health, and health promotion.                                                      |
|               |                                  | 6    | Information about method consulting                                                                                                                  | NA                   | The study group was advised by experts from [INSTITUTION] regarding statistics. Or:<br>No consulting in regard to method took place.                                                      |
|               |                                  | 7    | Information about the project background                                                                                                             | 3-5                  | The Delphi study was part of a mixed-methods study on [AIM].                                                                                                                              |
|               |                                  | 8    | Information about the study protocol                                                                                                                 | NA                   | The study protocol is available at [LINK].                                                                                                                                                |
|               | Content                          | 9    | Justification of the chosen method (Delphi) to answer the research question                                                                          | 5-7                  | The Delphi method is suitable for answering the research question because it systematically gathers the judgments of different expert groups and can identify agreement and disagreement. |
|               |                                  | 10   | Aim of the Delphi study (e.g., consensus, forecasting)                                                                                               | 7                    | The aim of the Delphi study is to find consensus on criteria to define a public health intervention.                                                                                      |
| III<br>Method | Body & Integration of knowledge  | 11   | Identification and elucidation of relevant expertise, spheres of experience, and perspectives (e.g., theory, practice, affected groups, disciplines) | 10-11                | The experts represent the sciences and clinical practice because [REASON].                                                                                                                |
|               |                                  | 12   | Handling of knowledge, expertise and perspectives which are missing or have been deliberately not integrated                                         | NA                   | If it is not possible to recruit experts specialized in [AREA], this will be openly communicated to the other experts during the Delphi study.                                            |
|               |                                  | 13   | Basic definition of expert <sup>a</sup>                                                                                                              | 11                   | A person who has been active in the area for at least [NUMBER] years is considered to be an expert.                                                                                       |
|               | Delphi variant and modifications | 14   | Identification of the type of Delphi variant and potential modifications (e.g., classic Delphi, real-time Delphi, group Delphi)                      | 7                    | A classic Delphi study was used [LITERATURE REFERENCE].                                                                                                                                   |
|               |                                  | 15   | Justification of the Delphi variant and modifications, including during the Delphi study, if applicable                                              | 7, 12                | If the willingness to participate clearly decreases between the first and second round, a third round will not be held.                                                                   |
|               | Sample of experts                | 16   | Selection criteria for the experts (per round, per expert group if applicable)                                                                       | 11                   | All of the experts who met the definition were invited to the first round. All of the experts who completed the previous round were invited to participate in the subsequent round.       |
|               |                                  | 17   | Identification of the experts                                                                                                                        | 11, 15               | The experts were identified based on publications in [DATABASE].                                                                                                                          |
|               |                                  | 18   | Information about recruiting and any subsequent recruiting of experts                                                                                | 11                   | The experts were informed about the Delphi study and invited to participate.                                                                                                              |

**Supplementary Table S1. CREDES checklist for Reporting Delphi studies**

| Topic | Section       | Item           | Checklist Item                                                                                                                                                                      | Reported on Page No.                                     | Exemplary wording                                                                                                                                                                               |
|-------|---------------|----------------|-------------------------------------------------------------------------------------------------------------------------------------------------------------------------------------|----------------------------------------------------------|-------------------------------------------------------------------------------------------------------------------------------------------------------------------------------------------------|
|       | Survey        | 19             | Elucidation of the content development for the questionnaire <sup>b</sup>                                                                                                           | 8-10                                                     | The questionnaire was developed based on the results of systematic reviews [LITERATURE REFERENCE].                                                                                              |
|       |               | 20             | Description of the questionnaire (content and structure)                                                                                                                            | 12                                                       | The questionnaire was divided into three segments on [TOPICS]. The statements made in the questionnaire were evaluated using standardized items, with the option to comment in free-text boxes. |
|       | Delphi rounds | 21             | Number of Delphi rounds                                                                                                                                                             | 12                                                       | Three Delphi rounds were held.                                                                                                                                                                  |
|       |               | 22             | Information about the aims of the individual Delphi rounds                                                                                                                          | 12                                                       | The first Delphi round focused on exploring relevant aspects. These aspects were then presented to the experts in the second Delphi round for standardized evaluation.                          |
|       |               | 23             | Disclosure and justification of the criterion for discontinuation                                                                                                                   | 12                                                       | The number of rounds was defined in advance to be a maximum of three rounds.                                                                                                                    |
|       | Feedback      | 24             | Information about what data was reported back per round                                                                                                                             | 12                                                       | In terms of feedback, we shared the statistical results plus the summary of the open responses.                                                                                                 |
|       |               | 25             | Information on how the results of the previous Delphi round were fed back to the experts surveyed (e.g., via frequencies, mean values, measures of dispersion, listing of comments) | 12                                                       | Mean values, standard deviations and percentage frequency distributions were reported.                                                                                                          |
|       |               | 26             | Information on whether feedback was differentiated by specific groups (e.g., by field of expertise, institutional affiliation)                                                      | NA                                                       | The feedback was aggregated across all expert groups.                                                                                                                                           |
|       |               | 27             | Information about how dissent and unclear results were handled                                                                                                                      | 12                                                       | The results showing dissent were presented again for evaluation in the next Delphi round.                                                                                                       |
|       | Data analysis | 28             | Disclosure of the quantitative and qualitative analytical strategy                                                                                                                  | 10, 13-14                                                | The quantitative items were descriptively analyzed. The open-ended items were analyzed using thematic analysis [LITERATURE REFERENCE].                                                          |
|       |               | 29             | Definition and measurement of consensus                                                                                                                                             | 12                                                       | Consensus was defined as percentage agreement, meaning that agreement was assumed if at least 80% of the respondents agreed on an item.                                                         |
|       |               | 30             | Information on group-specific analysis or weighting of experts (e.g., theory vs. practice, discipline-specific analysis)                                                            | NA                                                       | In the analysis, the mean values for percent agreement are weighted for each expert group in terms of the number of group members.                                                              |
|       | IV Results    | Delphi process | 31                                                                                                                                                                                  | Illustration of the Delphi study (e.g., in a flow chart) | 7                                                                                                                                                                                               |
| 32    |               |                | Information about special aspects during the Delphi study (e.g., deviations from the intended approach with justification)                                                          | NA                                                       | During the Delphi study the political discussion mentioned climate change and the effects on health. It is possible that this influenced the experts' responses.                                |

**Supplementary Table S1. CREDES checklist for Reporting Delphi studies**

| Topic               | Section                    | Item | Checklist Item                                                               | Reported on Page No. | Exemplary wording                                                                                                                                                                                                                              |
|---------------------|----------------------------|------|------------------------------------------------------------------------------|----------------------|------------------------------------------------------------------------------------------------------------------------------------------------------------------------------------------------------------------------------------------------|
|                     |                            | 33   | Number of experts per round (both invited and participating)                 | 15                   | The number of experts participating in the first Delphi round was [NUMBER], and the number of experts in the second round was [NUMBER]. This corresponds to a response rate of [NUMBER]% in the first round and [NUMBER]% in the second round. |
|                     | <b>Results</b>             | 34   | Presentation of the results for each Delphi round and the final results      | 15-17                | In the first Delphi round [NUMBER]% of the experts agreed, in the second [NUMBER]%, and in the third [NUMBER]%.                                                                                                                                |
| <b>V Discussion</b> | <b>Quality of findings</b> | 35   | Highlighting the findings from the Delphi study                              | 18-21                | The central findings can be summarized as follows: [STATE FINDINGS].                                                                                                                                                                           |
|                     |                            | 36   | Validity of the results (e.g., transferability of the findings)              | 18-22                | The results are not transferable to other countries due to different legal regulations.                                                                                                                                                        |
|                     |                            | 37   | Reliability of the results (e.g., split half, inter-rater reliability)       | 18                   | The responses in the free-text comments were analyzed by two independent reviewers [SPECIFY].                                                                                                                                                  |
|                     |                            | 38   | Reflection on potential limitations (e.g., number of experts, response bias) | 21-22                | The results are to be viewed critically with regard to the composition of the panel because [REASONS].                                                                                                                                         |

<sup>a</sup> “Experts” are the participants; these can be people from academia, practice, or representatives of lived experience (e.g., patients, family members).

<sup>b</sup> The term “questionnaire” stands for the survey instrument regardless of whether quantitative or qualitative items are integrated or weighted.

**Supplementary Table S2.The detailed third-level indicators****Final Results of the Third-level Indicators of the Evaluation Index System are shown in Table S2.****Table S2** Final Results of the Third-level Indicators of the Evaluation Index System

| Third-level Indicators                                                 | Importance score<br>(mean $\pm$ standard<br>deviation) | CV    | Weight | Agreement<br>rate |
|------------------------------------------------------------------------|--------------------------------------------------------|-------|--------|-------------------|
| A1.1 Growing Demand for TCM specialist nurses                          | 4.80 $\pm$ 0.41                                        | 0.086 | 3.24%  | 100.00%           |
| A1.2 Government Policy Support                                         | 4.80 $\pm$ 0.41                                        | 0.086 | 3.24%  | 100.00%           |
| A1.3 Availability of Financial Support for Training Programs           | 4.80 $\pm$ 0.41                                        | 0.086 | 3.24%  | 100.00%           |
| A2.1 Training needs for specialized knowledge in TCM nursing           | 4.93 $\pm$ 0.26                                        | 0.052 | 1.12%  | 100.00%           |
| A2.2 Training needs for specialized skills operation in TCM nursing    | 4.93 $\pm$ 0.26                                        | 0.052 | 1.12%  | 100.00%           |
| A2.3 Rationality of resource allocation in clinical practice bases     | 4.80 $\pm$ 0.56                                        | 0.117 | 0.56%  | 93.33%            |
| A2.4 Requirements for clinical teaching models and effects             | 4.80 $\pm$ 0.56                                        | 0.117 | 0.56%  | 93.33%            |
| A2.5 Training needs for policies and norms in TCM nursing              | 4.80 $\pm$ 0.56                                        | 0.117 | 0.56%  | 93.33%            |
| A3.1 Overall training objectives                                       | 4.80 $\pm$ 0.56                                        | 0.117 | 1.24%  | 93.33%            |
| A3.2 Training objectives at each stage                                 | 4.87 $\pm$ 0.52                                        | 0.106 | 2.47%  | 93.33%            |
| A3.3 Training objectives for specialized fields                        | 4.87 $\pm$ 0.52                                        | 0.106 | 2.47%  | 93.33%            |
| B1.1 Degree of Match between Course Objectives and Training Objectives | 4.80 $\pm$ 0.56                                        | 0.117 | 0.87%  | 93.33%            |
| B1.2 Degree of Rationality in Course Arrangement                       | 4.73 $\pm$ 0.59                                        | 0.126 | 0.51%  | 93.33%            |
| B1.3 Clinical Rotation Plan and Standards                              | 4.73 $\pm$ 0.59                                        | 0.126 | 0.51%  | 93.33%            |
| B1.4 Training Methods(Applicability and Diversity)                     | 4.80 $\pm$ 0.56                                        | 0.117 | 0.87%  | 93.33%            |
| B1.5 Assessment Methods(Applicability and Diversity)                   | 4.67 $\pm$ 0.62                                        | 0.132 | 0.34%  | 93.33%            |
| B2.1 Emergency Response Plan Development                               | 4.13 $\pm$ 0.83                                        | 0.202 | 0.33%  | 73.33%            |
| B2.2 Teaching Facilities and Equipment                                 | 4.53 $\pm$ 0.64                                        | 0.141 | 0.82%  | 93.33%            |
| B2.3 Library Resources and Electronic Information Resources            | 4.13 $\pm$ 0.83                                        | 0.202 | 0.33%  | 73.33%            |
| B2.4 Teaching Management Level                                         | 4.80 $\pm$ 0.56                                        | 0.117 | 1.61%  | 93.33%            |
| B3.1 Teaching Quality (Teaching Attitude and Skills)                   | 4.87 $\pm$ 0.52                                        | 0.106 | 0.76%  | 93.33%            |
| B3.2 Teaching Ability                                                  | 4.87 $\pm$ 0.52                                        | 0.106 | 0.76%  | 93.33%            |
| B3.3 Practical Skills Level of the Supervising Teachers                | 4.87 $\pm$ 0.52                                        | 0.106 | 0.76%  | 93.33%            |

**Supplementary Table S2. The detailed third-level indicators**

|                                                                                          |           |       |       |         |
|------------------------------------------------------------------------------------------|-----------|-------|-------|---------|
| B3.4 Professional Title Structure and Proportion                                         | 4.27±0.88 | 0.207 | 0.16% | 73.33%  |
| B3.5 Educational Level Structure and Proportion                                          | 4.33±0.90 | 0.208 | 0.21% | 73.33%  |
| B3.6 Ratio of Teachers and Students                                                      | 4.67±0.62 | 0.132 | 0.44% | 93.33%  |
| B4.1 Management Regulations for Training Fees                                            | 3.93±0.70 | 0.179 | 0.16% | 73.33%  |
| B4.2 Regulations for Training Time Arrangement and Scheduling                            | 4.53±0.74 | 0.164 | 0.35% | 86.67%  |
| B4.3 Management and Assessment Standards for Training Attendance                         | 4.73±0.70 | 0.149 | 0.60% | 86.67%  |
| B4.4 Operating and Management Norms of Practice Bases                                    | 4.87±0.52 | 0.106 | 1.13% | 93.33%  |
| B4.5 Clinical Supervision System                                                         | 4.80±0.56 | 0.117 | 0.86% | 93.33%  |
| B5.1 Sound Organization Structure                                                        | 3.93±0.80 | 0.203 | 0.17% | 73.33%  |
| B5.2 Feedback and Suggestion Mechanism                                                   | 4.80±0.56 | 0.117 | 0.90% | 93.33%  |
| B5.3 Continuous Support for Traditional Chinese Nursing Education and Career Development | 4.67±0.62 | 0.132 | 0.48% | 93.33%  |
| C1.1 Evaluation of the Nursing Laws and Regulations Course                               | 4.67±0.62 | 0.132 | 0.61% | 93.33%  |
| C1.2 Evaluation of the Theory Knowledge Course for TCM Nursing Specialization            | 5.00±0.00 | 0.000 | 2.04% | 100.00% |
| C1.3 Evaluation of the Nursing Practice Skills Course for TCM Nursing Specialization     | 5.00±0.00 | 0.000 | 2.04% | 100.00% |
| C1.4 Evaluation of the Advanced Nursing Practice Course                                  | 4.80±0.56 | 0.117 | 1.08% | 93.33%  |
| C1.5 Evaluation of the Research Course                                                   | 4.80±0.56 | 0.117 | 1.08% | 93.33%  |
| C2.1 Evaluation of Teaching Supervision                                                  | 4.80±0.41 | 0.086 | 1.12% | 100.00% |
| C2.2 Feedback Evaluation from TCM specialist nurses                                      | 4.93±0.26 | 0.052 | 2.38% | 100.00% |
| C2.3 Peer Evaluation among Teachers                                                      | 4.33±0.82 | 0.188 | 0.44% | 80.00%  |
| C2.4 Classroom Participation                                                             | 4.80±0.56 | 0.117 | 1.12% | 93.33%  |
| C2.5 Implementation of Feedback Loop                                                     | 4.87±0.52 | 0.106 | 1.81% | 93.33%  |
| C3.1 Attendance Rate                                                                     | 4.40±0.63 | 0.144 | 0.74% | 93.33%  |
| C3.2 Theory Examination Scores                                                           | 5.00±0.00 | 0.000 | 2.97% | 100.00% |
| C3.3 Examination Scores for TCM Appropriate Techniques                                   | 5.00±0.00 | 0.000 | 4.62% | 100.00% |
| C3.4 Completion Number of Group Plans                                                    | 4.87±0.52 | 0.106 | 2.18% | 93.33%  |
| C3.5 Number of Nursing Cases Completed                                                   | 4.87±0.52 | 0.106 | 2.18% | 93.33%  |

**Supplementary Table S2. The detailed third-level indicators**

---

|                                                                                                                                          |           |       |       |         |
|------------------------------------------------------------------------------------------------------------------------------------------|-----------|-------|-------|---------|
| C3.6 Pass Rate of TCM specialist nurses' Graduation Examination                                                                          | 4.53±0.64 | 0.141 | 1.05% | 93.33%  |
| D1.1 Work Attitude                                                                                                                       | 4.87±0.52 | 0.106 | 1.75% | 93.33%  |
| D1.2 Competency in Syndrome Differentiation Nursing                                                                                      | 4.87±0.52 | 0.106 | 1.75% | 93.33%  |
| D1.3 Ability in Handling Difficult and Critical Cases                                                                                    | 4.87±0.52 | 0.106 | 1.75% | 93.33%  |
| D1.4 TCM Health Education                                                                                                                | 4.87±0.35 | 0.072 | 1.75% | 100.00% |
| D1.5 Clinical Critical Thinking Ability in TCM                                                                                           | 5.00±0.00 | 0.000 | 3.01% | 100.00% |
| D1.6 Teaching Ability                                                                                                                    | 4.80±0.56 | 0.117 | 1.18% | 93.33%  |
| D1.7 Frequency of Participation in Continuing Education and Professional Development Activities for TCM Nursing by TCM specialist nurses | 4.73±0.59 | 0.126 | 0.94% | 93.33%  |
| D1.8 Number of Adverse Events Related to TCM Nursing Operations by TCM specialist nurses after Training                                  | 4.67±0.90 | 0.193 | 0.78% | 86.67%  |
| D2.1 Patient Satisfaction                                                                                                                | 4.80±0.56 | 0.117 | 2.43% | 93.33%  |
| D2.2 Clinical Implementation Cases of TCM Nursing Techniques                                                                             | 5.00±0.00 | 0.000 | 4.18% | 100.00% |
| D2.3 Outpatient Visits in TCM Nursing Clinics                                                                                            | 5.00±0.00 | 0.000 | 4.18% | 100.00% |
| D2.4 Number of Outgoing Lecturers                                                                                                        | 4.93±0.26 | 0.052 | 3.09% | 100.00% |
| D2.5 Number of Completed Cases of TCM Nursing Plans for Specialized Diseases                                                             | 4.93±0.26 | 0.052 | 3.09% | 100.00% |
| D2.6 Proportion of Published Papers                                                                                                      | 4.47±0.64 | 0.143 | 1.20% | 93.33%  |
| D2.7 Proportion of Project Applications                                                                                                  | 4.47±0.64 | 0.143 | 1.20% | 93.33%  |
| D2.8 Proportion of Obtained Patents                                                                                                      | 4.47±0.64 | 0.143 | 1.20% | 93.33%  |
| D2.9 Satisfaction of the Original Unit's Department                                                                                      | 4.27±0.80 | 0.187 | 0.77% | 80.00%  |
| D2.10 Satisfaction of Colleagues                                                                                                         | 4.20±0.68 | 0.161 | 0.62% | 86.67%  |
| D2.11 Self-satisfaction                                                                                                                  | 4.80±0.56 | 0.117 | 2.43% | 93.33%  |
| D2.12 Satisfaction of TCM Health Education                                                                                               | 4.13±0.64 | 0.155 | 0.52% | 86.67%  |
| D2.13 Promotion Rate of Position                                                                                                         | 4.33±0.82 | 0.188 | 0.89% | 80.00%  |

---

## Supplementary File 1. Theoretical mapping of the initial indicator system and Preliminary system

Theoretical mapping of the initial indicator system is presented in Table S1.1.

**Table S1.1** Theoretical mapping of the initial indicator system (Post-Interview, Pre-Delphi) using the integrated CIPP-Kirkpatrick framework

| CIPP Dimension (1st-level) | Integrated Kirkpatrick Level                                      | Theoretical Rationale / Definition                                                                                                                                                                                                                              | Derived 2nd-level Indicators (Initial Skeleton)(Examples) | Representative 3rd-level Indicators Mapped from Lit/Interview(Examples) | Primary Source           |
|----------------------------|-------------------------------------------------------------------|-----------------------------------------------------------------------------------------------------------------------------------------------------------------------------------------------------------------------------------------------------------------|-----------------------------------------------------------|-------------------------------------------------------------------------|--------------------------|
| A Context Evaluation       | None directly equivalent. It serves as a prerequisite foundation. | Serves as the foundational assessment of pre-training needs, objectives, and policy environment, acting as the prerequisite for the training program.                                                                                                           | A1 Training Needs                                         | A1.1 Basic Training Needs in Traditional Chinese Medicine               | Interview                |
|                            |                                                                   |                                                                                                                                                                                                                                                                 | A2 Training Objectives                                    | A2.1 Overall Training Objectives                                        | References               |
| B Input Evaluation         | None directly equivalent. It serves as a resource guarantee.      | Evaluates the structural, human, and material resource investments required to achieve the training objectives.                                                                                                                                                 | B1 Curriculum Construction                                | B1.2 Rationality of Course Arrangement                                  | References and Interview |
|                            |                                                                   |                                                                                                                                                                                                                                                                 |                                                           | B1.4 Dialectical nursing with teachers                                  | Interview                |
|                            |                                                                   |                                                                                                                                                                                                                                                                 | B3 Faculty Team                                           | B3.1 Teaching Quality (Teaching Attitude and Skills)                    | References               |
|                            |                                                                   |                                                                                                                                                                                                                                                                 |                                                           | B3.6 Ratio of Teachers to Students                                      | References and Interview |
| B5 Management Mechanism    | B5.2 Feedback and Suggestion                                      | References and Interview                                                                                                                                                                                                                                        |                                                           |                                                                         |                          |
|                            | B5.3 TCM nursing support system after training                    | Interview                                                                                                                                                                                                                                                       |                                                           |                                                                         |                          |
|                            |                                                                   |                                                                                                                                                                                                                                                                 |                                                           |                                                                         |                          |
| C Process Evaluation       | Integrated Kirkpatrick's Reaction Level.                          | Besides routine CIPP process monitoring of curriculum delivery, this dimension integrates learners' immediate reactions (e.g., satisfaction, engagement) under the specific heading of "Quality Assurance" to dynamically improve the ongoing training process. | C1 Training Content                                       | C1.3 Nursing Practice Skills Course for TCM Nursing Specialization      | Interview                |
|                            |                                                                   |                                                                                                                                                                                                                                                                 | C2 Quality assurance                                      | C2.1 Evaluation of Teaching Supervision                                 | Interview                |
|                            |                                                                   |                                                                                                                                                                                                                                                                 |                                                           | C2.4 Enthusiasm in class                                                | References and Interview |
| D Product Evaluation       | D1. Learning Level Assessment                                     | Evaluate the level of knowledge and skills that the trainees have                                                                                                                                                                                               | D1 Learning Level Assessment                              | D1.1 Attendance Rate                                                    | References               |
|                            |                                                                   |                                                                                                                                                                                                                                                                 |                                                           | D1.4 Examination Scores for TCM                                         | References and           |

## Supplementary File 1. Theoretical mapping of the initial indicator system and Preliminary system

|                               |                                                                                                                        |                              |                                                                                                                       |                             |
|-------------------------------|------------------------------------------------------------------------------------------------------------------------|------------------------------|-----------------------------------------------------------------------------------------------------------------------|-----------------------------|
|                               | acquired by the end of the training course.                                                                            |                              | Appropriate Techniques                                                                                                | Interview                   |
| D2. Behavior Level Assessment | Evaluation of the changes in nurses' clinical practice behaviors after returning to their positions following training | D2 Behavior Level Assessment | D2.2 Syndrome Differentiation - based Nursing<br><br>D2.3 The ability to inherit traditional Chinese medicine culture | Interview<br><br>Interview  |
| D3. Results Level Assessment  | Evaluate the organizational benefits, patient gains, and social impacts brought about by the behavioral changes.       | D3 Results Level Assessment  | D3.1 Patient Satisfaction<br><br>D3.5 Satisfaction of TCM culture inheritance                                         | References<br><br>Interview |

After the interview, regarding the research question of "evaluation of training effectiveness", the research team summarized and analyzed the interview materials, extracting 6 related themes and 32 sub-themes regarding the evaluation of the training effect of specialized nurses in traditional Chinese medicine: ① Evaluation of the training needs of trainees before the training; ② The training base should have the necessary training conditions; ③ The ability of syndrome differentiation and treatment is one of the core abilities of specialized nurses in traditional Chinese medicine; ④ Specialized nurses in traditional Chinese medicine need to possess professional qualities in traditional Chinese medicine nursing; ⑤ Continuous vocational education and career development support in traditional Chinese medicine nursing; ⑥ The training program requires continuous feedback to continuously improve the training process. The newly extracted indicators were compared with the list derived from the literature. Overlapping concepts were merged, indicators requiring clearer wording were modified, and new emerging indicators were retained after team discussion. Finally, after discussion by the research team, it was decided to add 1 secondary indicator of "training needs", and 12 tertiary indicators: "basic training needs in traditional Chinese medicine, training needs for specialized nurses in traditional Chinese medicine positions, follow-the-master classes for syndrome differentiation and treatment, ability of syndrome differentiation and treatment, support system for traditional Chinese medicine nursing after training, theoretical knowledge of traditional Chinese medicine nursing for specialized nurses, practical skills of traditional Chinese medicine nursing for specialized nurses, teaching supervision evaluation, feedback cycle link, ability to inherit traditional Chinese culture, participation in traditional Chinese medicine nursing continuing education and professional development activities, satisfaction with the inheritance of traditional Chinese culture". A total of 4 primary indicators, 12 secondary indicators and 57 tertiary indicators were included in the evaluation index system, see **the Supplementary Table S1.2**. The initial indicator pool for the Delphi survey was formed.

**Table S1.2** Preliminary system after Literature research and Semi-structured interviews

## Supplementary File 1. Theoretical mapping of the initial indicator system and Preliminary system

| First-level indicators                                | Second-level indicators                        | Third-level indicators                                                             | Source                                                                 |                          |
|-------------------------------------------------------|------------------------------------------------|------------------------------------------------------------------------------------|------------------------------------------------------------------------|--------------------------|
| A Context Evaluation                                  | A1 Training Needs                              | A1.1 Basic Training Needs in Traditional Chinese Medicine                          | Interview                                                              |                          |
|                                                       |                                                | A1.2 Training Needs for Specialist Nurse Positions in Traditional Chinese Medicine | Interview                                                              |                          |
|                                                       | A2 Training Objectives                         | A2.1 Overall Training Objectives                                                   | References                                                             |                          |
|                                                       |                                                | A2.2 Stage - specific Training Objectives                                          | References                                                             |                          |
|                                                       |                                                | A2.3 Specialized Training Objectives                                               | References                                                             |                          |
|                                                       | B Input Evaluation                             | B1 Curriculum Construction                                                         | B1.1 Degree of Match between Course Objectives and Training Objectives | References and Interview |
| B1.2 Rationality of Course Arrangement                |                                                |                                                                                    | References and Interview                                               |                          |
| B1.3 Clinical Rotation Plan and Standards             |                                                |                                                                                    | References and Interview                                               |                          |
| B1.4 Dialectical nursing with teachers                |                                                |                                                                                    | Interview                                                              |                          |
| B1.5 Scientific research courses                      |                                                |                                                                                    | References and Interview                                               |                          |
| B1.4 Training Methods (Applicability and Diversity)   |                                                |                                                                                    | References                                                             |                          |
| B1.5 Assessment Methods (Applicability and Diversity) |                                                |                                                                                    | References                                                             |                          |
| B2 Teaching Conditions                                |                                                |                                                                                    | B2.1 Barriers to implementation                                        | References               |
|                                                       |                                                | B2.2 Emergency Response Plan Development                                           | References                                                             |                          |
|                                                       |                                                | B2.3 Practical Skills Level                                                        | References                                                             |                          |
|                                                       |                                                | B2.4 Teaching Facilities and Equipment                                             | References and Interview                                               |                          |
|                                                       |                                                | B2.5 Library Resources and Electronic Information Resources                        | References                                                             |                          |
|                                                       |                                                | B2.6 Teaching Management Level                                                     | References and Interview                                               |                          |
|                                                       |                                                | B3 Faculty Team                                                                    | B3.1 Teaching Quality (Teaching Attitude and Skills)                   | References               |
|                                                       |                                                |                                                                                    | B3.2 Teaching Ability                                                  | References and Interview |
| B3.3 Professional Title Structure and Proportion      |                                                |                                                                                    | References                                                             |                          |
| B3.4 Educational Level Structure and Proportion       | References                                     |                                                                                    |                                                                        |                          |
| B3.5 Age structure ratio                              | References                                     |                                                                                    |                                                                        |                          |
| B3.6 Ratio of Teachers to Students                    | References and Interview                       |                                                                                    |                                                                        |                          |
| B4 Rules and Regulations                              | B4.1 Training fee system                       | References                                                                         |                                                                        |                          |
|                                                       | B4.2 Training time arrangement system          | References                                                                         |                                                                        |                          |
|                                                       | B4.3 Training attendance and assessment system | References                                                                         |                                                                        |                          |
|                                                       | B4.4 Clinical teaching system                  | References and Interview                                                           |                                                                        |                          |

## Supplementary File 1. Theoretical mapping of the initial indicator system and Preliminary system

|                      |                                |                                                                                                                                          |                          |
|----------------------|--------------------------------|------------------------------------------------------------------------------------------------------------------------------------------|--------------------------|
|                      | B5 Management Mechanism        | B5.1 Sound Organization Structure                                                                                                        | References               |
|                      |                                | B5.2 Feedback and Suggestion                                                                                                             | References and Interview |
|                      |                                | B5.3 TCM nursing support system after training                                                                                           | Interview                |
| C Process Evaluation | C1 Training Content            | C1.1 Nursing Laws and Regulations Course                                                                                                 | References               |
|                      |                                | C1.2 Theory Knowledge Course for TCM Nursing Specialization                                                                              | Interview                |
|                      |                                | C1.3 Nursing Practice Skills Course for TCM Nursing Specialization                                                                       | Interview                |
|                      | C2 Quality assurance           | C2.1 Evaluation of Teaching Supervision                                                                                                  | Interview                |
|                      |                                | C2.2 Feedback Evaluation from TCM specialist nurses                                                                                      | References and Interview |
|                      |                                | C2.3 Peer Evaluation among Teachers                                                                                                      | References               |
|                      |                                | C2.4 Enthusiasm in class                                                                                                                 | References and Interview |
|                      |                                | C2.5 Implementation of Feedback Loop                                                                                                     | Interview                |
| D Product Evaluation | D1 Learning Level Evaluation   | D1.1 Attendance Rate                                                                                                                     | References               |
|                      |                                | D1.2 Homework completion grade                                                                                                           | References and Interview |
|                      |                                | D1.3 Theory Examination Scores                                                                                                           | References and Interview |
|                      |                                | D1.4 Examination Scores for TCM Appropriate Techniques                                                                                   | References and Interview |
|                      |                                | D1.5 Pass Rate of Graduation Examination                                                                                                 | References and Interview |
|                      | D2 Behavioral Level Evaluation | D2.1 Work Attitude                                                                                                                       | References and Interview |
|                      |                                | D2.2 Syndrome Differentiation - based Nursing                                                                                            | Interview                |
|                      |                                | D2.3 The ability to inherit traditional Chinese medicine culture                                                                         | Interview                |
|                      |                                | D2.4 Teaching Ability (Teaching, Tutoring, Training, and Professional Guidance)                                                          | References and Interview |
|                      |                                | D2.5 The proportion of published papers and patents                                                                                      | References and Interview |
|                      |                                | D2.6 Frequency of Participation in Continuing Education and Professional Development Activities for TCM Nursing by TCM specialist nurses | Interview                |
|                      |                                | D2.7 Number of Adverse Events Related to TCM Nursing Operations after Training                                                           | References               |
|                      | D3 Result Level Evaluation     | D3.1 Patient Satisfaction                                                                                                                | References               |
|                      |                                | D3.2 Satisfaction of leaders                                                                                                             | References               |
|                      |                                | D3.3 Satisfaction of Colleagues                                                                                                          | References               |

**Supplementary File 1. Theoretical mapping of the initial indicator system and Preliminary system**

|                                              |                          |
|----------------------------------------------|--------------------------|
| D3.4 Self - satisfaction                     | References               |
| D3.5 Satisfaction of TCM culture inheritance | Interview                |
| D3.6 Promotion Rate of Position              | References and Interview |

---

## Supplementary File 2. Semi-structured Interview Guide and Basic information of interviewees

The complete interview guide is available in Supplementary Table S2.1.

Table S2.1 Semi-structured Interview Guide

| Interview Target Group | Interview Objective                                                                                                                                                                                                                                                               | Interview Questions                                                                                                                                                                                                                                                                                                                                                                                                                                                                                                                                                                                                                                                                                                                                                                                                                                                                                                                                                                                                          |
|------------------------|-----------------------------------------------------------------------------------------------------------------------------------------------------------------------------------------------------------------------------------------------------------------------------------|------------------------------------------------------------------------------------------------------------------------------------------------------------------------------------------------------------------------------------------------------------------------------------------------------------------------------------------------------------------------------------------------------------------------------------------------------------------------------------------------------------------------------------------------------------------------------------------------------------------------------------------------------------------------------------------------------------------------------------------------------------------------------------------------------------------------------------------------------------------------------------------------------------------------------------------------------------------------------------------------------------------------------|
| Nursing Managers       | To gain a detailed understanding of the influencing factors on training effectiveness (i.e., context evaluation and input evaluation indicators), key focus areas during the training (process evaluation indicators), and the training outcomes (product evaluation indicators). | <ol style="list-style-type: none"> <li>1. Could you please share your understanding of the effectiveness of the Traditional Chinese Medicine (TCM) specialist nurse training?</li> <li>2. What factors do you believe influence the effectiveness of TCM specialist nurse training? From what aspects do you think this effectiveness should be evaluated?</li> <li>3. From a long-term perspective, what indicators do you think reflect the training's effectiveness?</li> <li>4. After the training, what tasks do you expect them to be competent in? Alternatively, what qualities or abilities do you believe a qualified TCM specialist nurse should possess?</li> <li>5. What conditions do you think a TCM specialist nurse training base (center) should meet? Which of these are relatively more important?</li> <li>6. During the training process, what do you think we should focus on?</li> <li>7. Do you have any other suggestions regarding the current training effectiveness evaluation plan?</li> </ol> |
| TCM Nursing Experts    | To gather detailed supplementary information on the process evaluation indicators for training effectiveness.                                                                                                                                                                     | <ol style="list-style-type: none"> <li>1. Could you please share your understanding of the effectiveness of the TCM specialist nurse training?</li> <li>2. What factors do you believe influence the effectiveness of TCM specialist nurse training? From what aspects do you think this effectiveness should be evaluated?</li> <li>3. After the training, what qualities or abilities do you believe a TCM specialist nurse should possess? Alternatively, what tasks do you expect them to be competent in?</li> <li>4. During the training process, what else do you think should be focused on?</li> <li>5. Do you have any other suggestions regarding the current training effectiveness evaluation plan?</li> </ol>                                                                                                                                                                                                                                                                                                  |
| TCM Specialist Nurses  | To understand the evaluation needs from the perspective of TCM specialist nurses, in order to make the overall evaluation more comprehensive.                                                                                                                                     | <ol style="list-style-type: none"> <li>1. What have you gained from the training? After the training, what qualities or abilities do you believe a TCM specialist nurse should possess? Alternatively, what tasks do you expect to be competent in?</li> <li>2. What factors do you believe influence the effectiveness of TCM specialist nurse training? From what aspects do you think this effectiveness should be evaluated?</li> <li>3. How did the departments you rotated through conduct assessments and evaluations? Do you know the specific criteria? Did the departments have standardized mentorship (preceptorship) procedures?</li> </ol>                                                                                                                                                                                                                                                                                                                                                                     |

**Supplementary File 2. Semi-structured Interview Guide and Basic information of interviewees**

Are you satisfied with the training methods? Do you have any other suggestions?

4. During the training process, what aspects do you most hope the nurse manager (head nurse) will focus on?
5. Do you have any other suggestions regarding the current training effectiveness evaluation plan?

The basic information of the interview participants is presented in Supplementary Table S2.2.

**Table S2.2** Basic Information of Interviewees (n=20)

| Code | Gender | Age (Years) | Professional Title            | Highest Degree | Years in Nursing Practice | Current field of work |
|------|--------|-------------|-------------------------------|----------------|---------------------------|-----------------------|
| N1   | Female | 38          | Nurse Supervisor              | Bachelor       | 14                        | Clinical Nursing      |
| N2   | Female | 41          | Nurse Supervisor              | Bachelor       | 15                        | Clinical Nursing      |
| N3   | Female | 42          | Nurse Supervisor              | Bachelor       | 21                        | Clinical Nursing      |
| N4   | Man    | 33          | Nurse Practitioner            | Bachelor       | 7                         | Clinical Nursing      |
| N5   | Female | 45          | Co-chief superintendent nurse | Bachelor       | 24                        | Nursing Management    |
| N6   | Female | 42          | Co-chief superintendent nurse | Bachelor       | 18                        | Clinical Nursing      |
| N7   | Female | 40          | Nurse Supervisor              | Bachelor       | 16                        | Clinical Nursing      |
| N8   | Female | 45          | Associate senior              | Bachelor       | 25                        | Clinical Nursing      |
| N9   | Female | 42          | Nurse Supervisor              | Bachelor       | 20                        | Clinical Nursing      |
| N10  | Female | 34          | Nurse Supervisor              | Bachelor       | 12                        | Clinical Nursing      |
| N11  | Female | 35          | Nurse Supervisor              | Bachelor       | 14                        | Nursing Management    |
| N12  | Female | 38          | Nurse Supervisor              | Bachelor       | 17                        | Clinical Nursing      |
| N13  | Female | 33          | Nurse Supervisor              | Bachelor       | 15                        | Clinical Nursing      |
| N14  | Female | 50          | Chief superintendent nurse    | Bachelor       | 27                        | Nursing Management    |
| N15  | Female | 48          | Chief superintendent nurse    | Bachelor       | 26                        | Nursing Education     |
| N16  | Female | 38          | Chief superintendent nurse    | Master         | 16                        | Nursing Management    |
| N17  | Female | 48          | Chief superintendent nurse    | Bachelor       | 26                        | Nursing Management    |
| N18  | Female | 54          | Chief superintendent nurse    | Bachelor       | 35                        | Nursing Management    |
| N19  | Female | 36          | Nurse Supervisor              | Bachelor       | 15                        | Nursing Education     |
| N20  | Female | 49          | Co-chief superintendent nurse | Bachelor       | 26                        | Nursing Management    |

**Supplementary File 3. AHP Judgment Matrices and Consistency Testing Results**  
**1. Methodology Overview**

To ensure the scientific rigor of the indicator weights, the Analytic Hierarchy Process (AHP) was employed following the Delphi consultations. The judgment matrices were constructed based on the absolute differences in mean importance scores from the second round of expert inquiries. These differences were systematically mapped to the Saaty 1–9 scale to quantify the relative importance between paired indicators. Judgment Matrix for 1st-level Indicators is shown in Supplementary Table S3.1.

**Table S3.1** Judgment Matrix for 1st-level Indicators

| Indicators  | Context (A) | Input (B) | Process (C) | Outcome (D) |
|-------------|-------------|-----------|-------------|-------------|
| Context (A) | 1           | 2         | 0.5         | 0.5         |
| Input (B)   | 0.5         | 1         | 0.5         | 0.5         |
| Process (C) | 2           | 2         | 1           | 0.5         |
| Outcome (D) | 2           | 2         | 2           | 1           |

**2. Representative Matrix Logic**

Due to the extensive number of indicators (71 tertiary items), we provide a representative matrix to illustrate the pairwise comparison logic at the granular level. The Behavioral Layer Evaluation (D1) was selected as it represents a core dimension of the Kirkpatrick model integrated into this study, see the Table S3.2.

**Table S3.2** Representative Judgment Matrix for 3rd-level Indicators (D1 Behavioral Level Evaluation)

| Indicators | D1.1 | D1.2 | D1.3 | D1.4 | D1.5  | D1.6 | D1.7 | D1.8 |
|------------|------|------|------|------|-------|------|------|------|
| D1.1       | 1    | 1    | 1    | 1    | 0.5   | 2    | 2    | 2    |
| D1.2       | 1    | 1    | 1    | 1    | 0.5   | 2    | 2    | 2    |
| D1.3       | 1    | 1    | 1    | 1    | 0.5   | 2    | 2    | 2    |
| D1.4       | 1    | 1    | 1    | 1    | 0.5   | 2    | 2    | 2    |
| D1.5       | 2    | 2    | 2    | 2    | 1     | 2    | 3    | 3    |
| D1.6       | 0.5  | 0.5  | 0.5  | 0.5  | 0.5   | 1    | 2    | 2    |
| D1.7       | 0.5  | 0.5  | 0.5  | 0.5  | 0.333 | 0.5  | 1    | 2    |
| D1.8       | 0.5  | 0.5  | 0.5  | 0.5  | 0.333 | 0.5  | 0.5  | 1    |

D1.1 Work Attitude、 D1.2 Competency in Syndrome Differentiation Nursing, D1.3 Ability in Handling Difficult and Critical Cases, D1.4 TCM Health Education、 D1.5 Clinical Critical Thinking Ability in TCM, D1.6 Teaching Ability, D1.7 Frequency of Participation in Continuing Education and Professional Development Activities for TCM Nursing by TCM specialist nurses, D1.8 Number of Adverse Events Related to TCM Nursing Operations by TCM specialist nurses after Training

**3. Comprehensive Results and Mathematical Validation**

To confirm the mathematical validity of the entire system, Table S3.3 summarizes the weights and consistency test results for all indicators.

**Table S3.3** Comprehensive AHP Results and Consistency Testing

| Eigenvector | Local Weight | $\lambda_{max}$ | CI | RI | CR | Result |
|-------------|--------------|-----------------|----|----|----|--------|
|-------------|--------------|-----------------|----|----|----|--------|

### Supplementary File 3. AHP Judgment Matrices and Consistency Testing Results

| Indicators                                                             |       |         |       |       |      |       |      |  |
|------------------------------------------------------------------------|-------|---------|-------|-------|------|-------|------|--|
| A1 Training Needs                                                      |       |         | 3     | 0     | 0.52 | 0     | Pass |  |
| A1.1 Growing Demand for TCM specialist nurses                          | 1     | 0.3333  |       |       |      |       |      |  |
| A1.2 Government Policy Support                                         | 1     | 0.3333  |       |       |      |       |      |  |
| A1.3 Availability of Financial Support for Training Programs           | 1     | 0.3333  |       |       |      |       |      |  |
| A2 Training Objectives                                                 |       |         | 5     | 5     | 1.12 | 0     | Pass |  |
| A2.1 Training needs for specialized knowledge in TCM nursing           | 1.429 | 0.28571 |       |       |      |       |      |  |
| A2.2 Training needs for specialized skills operation in TCM nursing    | 1.429 | 0.28571 |       |       |      |       |      |  |
| A2.3 Rationality of resource allocation in clinical practice bases     | 0.714 | 0.14286 |       |       |      |       |      |  |
| A2.4 Requirements for clinical teaching models and effects             | 0.714 | 0.14286 |       |       |      |       |      |  |
| A2.5 Training needs for policies and norms in TCM nursing              | 0.714 | 0.14286 |       |       |      |       |      |  |
| A3 Industry and Policy Background                                      |       |         | 3     | 0     | 0.52 | 0     | Pass |  |
| A3.1 Overall training objectives                                       | 0.6   | 0.2     |       |       |      |       |      |  |
| A3.2 Training objectives at each stage                                 | 1.2   | 0.4     |       |       |      |       |      |  |
| A3.3 Training objectives for specialized fields                        | 1.2   | 0.4     |       |       |      |       |      |  |
| B1 Curriculum Construction                                             |       |         | 5.078 | 0.019 | 1.12 | 0.017 | Pass |  |
| B1.1 Degree of Match between Course Objectives and Training Objectives | 1.409 | 0.28181 |       |       |      |       |      |  |
| B1.2 Degree of Rationality in Course Arrangement                       | 0.816 | 0.16313 |       |       |      |       |      |  |
| B1.3 Clinical Rotation Plan and Standards                              | 0.816 | 0.16313 |       |       |      |       |      |  |
| B1.4 Training Methods(Applicability and Diversity)                     | 1.409 | 0.28181 |       |       |      |       |      |  |
| B1.5 Assessment Methods(Applicability and Diversity)                   | 0.551 | 0.11013 |       |       |      |       |      |  |
| B2 Teaching Conditions                                                 |       |         | 4.083 | 0.028 | 0.89 | 0.031 | Pass |  |
| B2.1 Emergency Response Plan Development                               | 0.43  | 0.1075  |       |       |      |       |      |  |
| B2.2 Teaching Facilities and Equipment                                 | 1.063 | 0.26569 |       |       |      |       |      |  |
| B2.3 Library Resources and Electronic Information Resources            | 0.43  | 0.1075  |       |       |      |       |      |  |
| B2.4 Teaching Management Level                                         | 2.077 | 0.5193  |       |       |      |       |      |  |
| B3 Faculty Team                                                        |       |         | 6.083 | 0.017 | 1.26 | 0.013 | Pass |  |
| B3.1 Teaching Quality (Teaching Attitude and Skills)                   | 1.476 | 0.24592 |       |       |      |       |      |  |
| B3.2 Teaching Ability                                                  | 1.476 | 0.24592 |       |       |      |       |      |  |
| B3.3 Practical Skills Level of the Supervising Teachers                | 1.476 | 0.24592 |       |       |      |       |      |  |
| B3.4 Professional Title Structure and Proportion                       | 0.317 | 0.05281 |       |       |      |       |      |  |
| B3.5 Educational Level Structure and Proportion                        | 0.403 | 0.06712 |       |       |      |       |      |  |
| B3.6 Ratio of Teachers and Students                                    | 0.854 | 0.14232 |       |       |      |       |      |  |
| B4 Rules and Regulations                                               |       |         | 5.133 | 0.033 | 1.12 | 0.03  | Pass |  |
| B4.1 Management Regulations for Training Fees                          | 0.252 | 0.05039 |       |       |      |       |      |  |
| B4.2 Regulations for Training Time Arrangement and Scheduling          | 0.567 | 0.1134  |       |       |      |       |      |  |
| B4.3 Management and Assessment Standards for Training Attendance       | 0.974 | 0.19484 |       |       |      |       |      |  |
| B4.4 Operating and Management Norms of Practice Bases                  | 1.826 | 0.36521 |       |       |      |       |      |  |
| B4.5 Clinical Supervision System                                       | 1.381 | 0.27615 |       |       |      |       |      |  |
| B5 Management Mechanism                                                |       |         | 3.004 | 0.002 | 0.52 | 0.004 | Pass |  |
| B5.1 Sound Organization Structure                                      | 0.329 | 0.10959 |       |       |      |       |      |  |
| B5.2 Feedback and Suggestion Mechanism                                 | 1.744 | 0.58126 |       |       |      |       |      |  |

### Supplementary File 3. AHP Judgment Matrices and Consistency Testing Results

|                                                                                                                                          |       |         |        |       |      |       |      |
|------------------------------------------------------------------------------------------------------------------------------------------|-------|---------|--------|-------|------|-------|------|
| B5.3 Continuous Support for Traditional Chinese Nursing Education and Career Development                                                 | 0.927 | 0.30915 |        |       |      |       |      |
| C1 Training Content                                                                                                                      |       |         | 5.013  | 0.003 | 1.12 | 0.003 | Pass |
| C1.1 Evaluation of the Nursing Laws and Regulations Course                                                                               | 0.445 | 0.08895 |        |       |      |       |      |
| C1.2 Evaluation of the Theory Knowledge Course for TCM Nursing Specialization                                                            | 1.488 | 0.29762 |        |       |      |       |      |
| C1.3 Evaluation of the Nursing Practice Skills Course for TCM Nursing Specialization                                                     | 1.488 | 0.29762 |        |       |      |       |      |
| C1.4 Evaluation of the Advanced Nursing Practice Course                                                                                  | 0.79  | 0.1579  |        |       |      |       |      |
| C1.5 Evaluation of the Research Course                                                                                                   | 0.79  | 0.1579  |        |       |      |       |      |
| C2 Teaching Evaluation                                                                                                                   |       |         | 5.085  | 0.021 | 1.12 | 0.019 | Pass |
| C2.1 Evaluation of Teaching Supervision                                                                                                  | 0.815 | 0.16305 |        |       |      |       |      |
| C2.2 Feedback Evaluation from TCM specialist nurses                                                                                      | 1.732 | 0.34649 |        |       |      |       |      |
| C2.3 Peer Evaluation among Teachers                                                                                                      | 0.322 | 0.06433 |        |       |      |       |      |
| C2.4 Classroom Participation                                                                                                             | 0.815 | 0.16305 |        |       |      |       |      |
| C2.5 Implementation of Feedback Loop                                                                                                     | 1.315 | 0.26307 |        |       |      |       |      |
| C3 Learning Layer Evaluation                                                                                                             |       |         | 6.336  | 0.067 | 1.26 | 0.053 | Pass |
| C3.1 Attendance Rate                                                                                                                     | 0.322 | 0.05368 |        |       |      |       |      |
| C3.2 Theory Examination Scores                                                                                                           | 1.298 | 0.21628 |        |       |      |       |      |
| C3.3 Examination Scores for TCM Appropriate Techniques                                                                                   | 2.018 | 0.33634 |        |       |      |       |      |
| C3.4 Completion Number of Group Plans                                                                                                    | 0.951 | 0.15852 |        |       |      |       |      |
| C3.5 Number of Nursing Cases Completed                                                                                                   | 0.951 | 0.15852 |        |       |      |       |      |
| C3.6 Pass Rate of TCM specialist nurses' Graduation Examination                                                                          | 0.46  | 0.07667 |        |       |      |       |      |
| D1 Behavioral Layer Evaluation                                                                                                           |       |         | 8.152  | 0.022 | 1.41 | 0.015 | Pass |
| D1.1 Work Attitude                                                                                                                       | 1.083 | 0.13537 |        |       |      |       |      |
| D1.2 Competency in Syndrome Differentiation Nursing                                                                                      | 1.083 | 0.13537 |        |       |      |       |      |
| D1.3 Ability in Handling Difficult and Critical Cases                                                                                    | 1.083 | 0.13537 |        |       |      |       |      |
| D1.4 TCM Health Education                                                                                                                | 1.083 | 0.13537 |        |       |      |       |      |
| D1.5 Clinical Critical Thinking Ability in TCM                                                                                           | 1.868 | 0.23347 |        |       |      |       |      |
| D1.6 Teaching Ability                                                                                                                    | 0.733 | 0.09162 |        |       |      |       |      |
| D1.7 Frequency of Participation in Continuing Education and Professional Development Activities for TCM Nursing by TCM specialist nurses | 0.582 | 0.07279 |        |       |      |       |      |
| D1.8 Number of Adverse Events Related to TCM Nursing Operations by TCM specialist nurses after Training                                  | 0.485 | 0.06066 |        |       |      |       |      |
| D2 Result Layer Evaluation                                                                                                               |       |         | 13.498 | 0.042 | 1.56 | 0.027 | Pass |
| D2.1 Patient Satisfaction                                                                                                                | 1.225 | 0.09421 |        |       |      |       |      |
| D2.2 Clinical Implementation Cases of TCM Nursing Techniques                                                                             | 2.104 | 0.16187 |        |       |      |       |      |
| D2.3 Outpatient Visits in TCM Nursing Clinics                                                                                            | 2.104 | 0.16187 |        |       |      |       |      |
| D2.4 Number of Outgoing Lecturers                                                                                                        | 1.558 | 0.11981 |        |       |      |       |      |
| D2.5 Number of Completed Cases of TCM Nursing Plans for Specialized Diseases                                                             | 1.558 | 0.11981 |        |       |      |       |      |
| D2.6 Proportion of Published Papers                                                                                                      | 0.606 | 0.04665 |        |       |      |       |      |
| D2.7 Proportion of Project Applications                                                                                                  | 0.606 | 0.04665 |        |       |      |       |      |
| D2.8 Proportion of Obtained Patents                                                                                                      | 0.606 | 0.04665 |        |       |      |       |      |
| D2.9 Satisfaction of the Original Unit's Department                                                                                      | 0.387 | 0.02978 |        |       |      |       |      |

### **Supplementary File 3. AHP Judgment Matrices and Consistency Testing Results**

---

|                                            |       |         |
|--------------------------------------------|-------|---------|
| D2.10 Satisfaction of Colleagues           | 0.31  | 0.02383 |
| D2.11 Self-satisfaction                    | 1.225 | 0.09421 |
| D2.12 Satisfaction of TCM Health Education | 0.264 | 0.02028 |
| D2.13 Promotion Rate of Position           | 0.447 | 0.03437 |

---

## Supplementary File 4.Results of the First Round of Inquiry

### Results of the First Round of Inquiry

The first round of the inquiry questionnaire includes 4 primary indicators, 12 secondary indicators, and 57 tertiary indicators.

#### 1.1 Results of the Primary Indicators Inquiry

No changes were made. Experts suggested evaluating overall strategic direction or resource allocation, but the research team concluded these were already covered by existing secondary and tertiary indicators, see Table S4.1.

**Table S4.1** Results of the First-Round Delphi Survey on Primary Indicators

| First Level Indicators | The mean importance scores | Standard deviation of importance score | CV    | Agreement rate | Results |
|------------------------|----------------------------|----------------------------------------|-------|----------------|---------|
| A.Context valuation    | 4.73                       | 0.594                                  | 0.126 | 93.33%         | retain  |
| B.Input evaluation     | 4.47                       | 0.743                                  | 0.166 | 86.67%         | retain  |
| C.Process evaluation   | 4.93                       | 0.258                                  | 0.052 | 100.00%        | retain  |
| D.Product valuation    | 5.00                       | 0.000                                  | 0.000 | 100.00%        | retain  |

#### 1.2 Secondary Indicators

Results of the First-Round Delphi Survey on Secondary Indicators are shown in table S4.2.

##### Notes on adjustments based on expert consensus:

##### Added (n=1):

Experts recommended including a new secondary indicator under "A. Context Evaluation" to reflect the policy background. After discussion, the research team added the indicator "A3 Industry and Policy Background."

##### Modified (n=2):

C2 Quality Assurance" was renamed to "C2 Teaching Evaluation" to better reflect its tertiary indicators.

"D1 Learning Level Evaluation" was relocated to Process Evaluation and renamed "C3 Learning Level Evaluation", as theoretical learning occurs early in training.

**Unmodified Indicators:** Some experts suggested that the naming of training outcome evaluation indicators should be more substantive and practical—for example, suggesting that the reaction level reflect training attitudes, the learning level reflect knowledge and skills, the behavior level refer to clinical application and practice, and the results level reflect output performance. However, after discussion, the research team determined that these naming suggestions neither encompassed the indicators already listed nor aligned

**Supplementary File 4. Results of the First Round of Inquiry**  
directly with the application of Kirkpatrick’s model.

**Table S4.2** Results of the First-Round Delphi Survey on Secondary Indicators

| Second Level Indicators           | The mean importance scores | Standard deviation of importance score | CV    | Agreement rate | Results |
|-----------------------------------|----------------------------|----------------------------------------|-------|----------------|---------|
| A1 Training Needs                 | 4.40                       | 0.910                                  | 0.207 | 86.67%         | retain  |
| A2 Training Objectives            | 4.73                       | 0.799                                  | 0.169 | 93.33%         | retain  |
| B1 Curriculum Construction        | 4.93                       | 0.258                                  | 0.052 | 100.00%        | retain  |
| B2 Teaching Conditions            | 4.87                       | 0.352                                  | 0.072 | 100.00%        | retain  |
| B3 Faculty Team                   | 4.93                       | 0.258                                  | 0.052 | 100.00%        | retain  |
| B4 Rules and Regulations          | 4.87                       | 0.352                                  | 0.072 | 100.00%        | retain  |
| B5 Management Mechanism           | 4.87                       | 0.352                                  | 0.072 | 100.00%        | retain  |
| C1 Training Content               | 4.87                       | 0.516                                  | 0.106 | 93.33%         | retain  |
| C2 Teaching Evaluation            | 4.87                       | 0.516                                  | 0.106 | 93.33%         | retain  |
| C3 Learning Layer Evaluation      | 4.93                       | 0.258                                  | 0.052 | 100.00%        | retain  |
| D1 Behavioral Layer Evaluation    | 4.80                       | 0.414                                  | 0.086 | 100.00%        | retain  |
| D2 Result Layer Evaluation        | 5.00                       | 0.000                                  | 0.000 | 100.00%        | retain  |
| A3 Industry and Policy Background | —                          | —                                      | —     | —              | add     |

### 1.3 Tertiary Indicators

Results of the First-Round Delphi Survey on Tertiary Indicators are shown in table S4.3.

Notes on adjustments based on expert consensus:

**Deleted (n=2):** “B2.1 Implementation Barriers” and “B3.5 Age Structure and Ratio” (due to CV > 0.25 and expert recommendation).

**Modified Indicators (n=19):**

**① Clarification of Scope/Subject(n=3):**

“D2.7 Number of Adverse Events Related to TCM Nursing Operations after Training” -> Specified the subject and timing to address a CV > 0.25.

#### **Supplementary File 4.Results of the First Round of Inquiry**

“D1.2 Homework completion grade” -> Clarified and split into specific group plans and nursing case reports.

“D1.5 Pass Rate of Graduation Examination” -> Refined to clarify the evaluation target (TCM specialist nurses).

#### **②Terminology Refinement(n=4):**

“D2.3 The ability to inherit traditional Chinese medicine culture” -> Renamed to “TCM Health Education”.

“D3.5 Satisfaction of TCM culture inheritance” -> Renamed to “Satisfaction with TCM Health Education”.

“D3.2 Satisfaction of leaders” -> Redefined to clarify the leadership level (Department Heads).

“D3.6 Promotion Rate of Position” -> Refined for improved academic terminology.

#### **③Reclassification/Repositioning(n=3):**

“B1.4 Dialectical nursing with teachers” -> Repositioned to Product Evaluation as competency in syndrome differentiation.

“B1.5 Scientific research courses” -> Reclassified to Process Evaluation under Training Content.

“B2.3 Practical Skills Level” -> Repositioned to Faculty Team to clarify it refers to instructors.

#### **④Standardization of Naming (Systems & Policies)(n=3):**

“B4.1 Training fee system” -> Standardized to “Regulations on Training Fees Management”.

“B4.2 Training time arrangement system” -> Standardized to “Regulations on Training Time Arrangement and Scheduling”.

“B4.3 Training attendance and assessment system” -> Standardized to “Regulations on Attendance Management and Assessment”.

#### **⑤Learner-Centered & Specific Course Evaluation Shift(n=4):**

“C1.1 Nursing Laws and Regulations Course” -> Renamed to reflect specific course evaluation.

“C1.2 Theory Knowledge Course for TCM Nursing Specialization” -> Renamed to reflect specific course evaluation.

“C1.3 Nursing Practice Skills Course for TCM Nursing Specialization” -> Renamed to reflect specific course evaluation.

#### Supplementary File 4. Results of the First Round of Inquiry

“C2.2 Feedback Evaluation from TCM specialist nurses” -> Renamed to reflect learner-centered evaluation.

#### ⑥ Removal of Redundancies & Splitting (n=2):

“A1.1 Basic Training Needs in Traditional Chinese Medicine” -> Removed redundant descriptions in parentheses.

“D2.5 The proportion of published papers and patents” -> Split into separate indicators for papers, project applications, and patents.

#### Unmodified (n=3):

Additions rejected:

Expert proposals to add new needs under A1 were deemed redundant with existing A1.2.

Deletions rejected:

B1.2 Rationality of Curriculum Arrangement: Retained despite subjective concerns, citing the value of qualitative indicators in CIPP evaluation.

C2.3 Peer Evaluation among Instructors: Retained despite limited implementation, emphasizing its role in improving teaching quality.

**Added (n=8):** ① A3.1 Increasing Demand for TCM Specialist Nurses in Society; A3.2 National Policy Support. ② B4.4 Regulations on the Operation and Management of Practice Bases. ③ C1.4 Evaluation of Advanced Nursing Practice Courses. ④ To enhance outcome-level evaluation, the following indicators were added: D2.2 Number of Clinical Cases Utilizing TCM Nursing Techniques; D2.3 Number of TCM Nursing Outpatient Visits; D2.4 Number of External Teaching Assignments; D2.5 Number of Completed TCM Nursing Plans for Specialized Diseases.

**Table S4.3** Results of the First-Round Delphi Survey on Tertiary Indicators

| Third Level Indicators                                                             | The mean importance scores | Standard deviation of importance score | CV    | Agreement rate | Results |
|------------------------------------------------------------------------------------|----------------------------|----------------------------------------|-------|----------------|---------|
| A1.1 Basic Training Needs in Traditional Chinese Medicine                          | 4.80                       | 0.561                                  | 0.117 | 93.33%         | modify  |
| A1.2 Training Needs for Specialist Nurse Positions in Traditional Chinese Medicine | 4.80                       | 0.561                                  | 0.117 | 93.33%         | retain  |
| A2.1 Overall Training Objectives                                                   | 4.67                       | 0.816                                  | 0.175 | 93.33%         | retain  |

**Supplementary File 4.Results of the First Round of Inquiry**

---

|                                                                        |      |       |                    |        |        |
|------------------------------------------------------------------------|------|-------|--------------------|--------|--------|
| A2.2 Stage - specific Training Objectives                              | 4.80 | 0.775 | 0.161              | 93.33% | retain |
| A2.3 Specialized Training Objectives                                   | 4.80 | 0.775 | 0.161              | 93.33% | retain |
| B1.1 Degree of Match between Course Objectives and Training Objectives | 4.80 | 0.561 | 0.117              | 93.33% | retain |
| B1.2 Rationality of Course Arrangement                                 | 4.73 | 0.594 | 0.126              | 93.33% | retain |
| B1.3 Clinical Rotation Plan and Standards                              | 4.73 | 0.594 | 0.126              | 93.33% | retain |
| B1.4 Dialectical nursing with teachers                                 | 4.67 | 0.724 | 0.155              | 93.33% | modify |
| B1.5 Scientific research courses                                       | 4.33 | 0.900 | 0.208              | 73.33% | modify |
| B1.6 Training Methods (Applicability and Diversity)                    | 4.60 | 0.632 | 0.137              | 93.33% | retain |
| B1.7 Assessment Methods (Applicability and Diversity)                  | 4.40 | 0.737 | 0.168              | 86.67% | retain |
| B2.1 Barriers to implementation                                        | 3.93 | 1.100 | 0.280 <sup>#</sup> | 73.33% | delete |
| B2.2 Emergency Response Plan Development                               | 4.27 | 0.799 | 0.187              | 80.00% | retain |
| B2.3 Practical Skills Level                                            | 4.67 | 0.617 | 0.132              | 93.33% | modify |
| B2.4 Teaching Facilities and Equipment                                 | 4.53 | 0.743 | 0.164              | 86.67% | retain |
| B2.5 Library Resources and Electronic Information Resources            | 4.13 | 0.743 | 0.18               | 80.00% | retain |
| B2.6 Teaching Management Level                                         | 4.67 | 0.617 | 0.132              | 93.33% | retain |
| B3.1 Teaching Quality (Teaching Attitude and Skills)                   | 4.87 | 0.516 | 0.106              | 93.33% | retain |
| B3.2 Teaching Ability                                                  | 4.87 | 0.516 | 0.106              | 93.33% | retain |
| B3.3 Professional Title Structure and Proportion                       | 4.13 | 0.834 | 0.202              | 73.33% | retain |
| B3.4 Educational Level Structure and Proportion                        | 4.13 | 0.990 | 0.240              | 73.33% | retain |
| B3.5 Age structure ratio                                               | 3.93 | 1.223 | 0.311 <sup>#</sup> | 73.33% | delete |
| B3.6 Ratio of Teachers to Students                                     | 4.40 | 0.828 | 0.188              | 80.00% | retain |
| B4.1 Training fee system                                               | 3.80 | 0.676 | 0.178              | 66.67% | modify |
| B4.2 Training time arrangement system                                  | 4.27 | 0.799 | 0.187              | 80.00% | modify |
| B4.3 Training attendance and assessment system                         | 4.47 | 0.743 | 0.166              | 86.67% | modify |
| B4.4 Clinical teaching system                                          | 4.73 | 0.594 | 0.126              | 93.33% | retain |
| B5.1 Sound Organization Structure                                      | 4.47 | 0.743 | 0.166              | 86.67% | retain |

---

**Supplementary File 4.Results of the First Round of Inquiry**

---

|                                                                                                                                          |      |       |                    |         |        |
|------------------------------------------------------------------------------------------------------------------------------------------|------|-------|--------------------|---------|--------|
| B5.2 Feedback and Suggestion                                                                                                             | 4.67 | 0.617 | 0.132              | 93.33%  | retain |
| B5.3 TCM nursing support system after training                                                                                           | 4.40 | 0.632 | 0.144              | 93.33%  | retain |
| C1.1 Nursing Laws and Regulations Course                                                                                                 | 4.27 | 0.594 | 0.139              | 93.33%  | modify |
| C1.2 Theory Knowledge Course for TCM Nursing Specialization                                                                              | 4.93 | 0.258 | 0.052              | 100.00% | modify |
| C1.3 Nursing Practice Skills Course for TCM Nursing Specialization                                                                       | 4.93 | 0.258 | 0.052              | 100.00% | modify |
| C2.1 Evaluation of Teaching Supervision                                                                                                  | 4.53 | 0.640 | 0.141              | 93.33%  | retain |
| C2.2 Feedback Evaluation from TCM specialist nurses                                                                                      | 4.60 | 0.632 | 0.137              | 93.33%  | modify |
| C2.3 Peer Evaluation among Teachers                                                                                                      | 4.00 | 0.655 | 0.164              | 80.00%  | retain |
| C2.4 Enthusiasm in class                                                                                                                 | 4.53 | 0.640 | 0.141              | 93.33%  | retain |
| C2.5 Implementation of Feedback Loop                                                                                                     | 4.73 | 0.594 | 0.126              | 93.33%  | retain |
| D1.1 Attendance Rate                                                                                                                     | 4.87 | 0.516 | 0.106              | 93.33%  | retain |
| D1.2 Homework completion grade                                                                                                           | 4.87 | 0.516 | 0.106              | 93.33%  | modify |
| D1.3 Theory Examination Scores                                                                                                           | 5.00 | 0.000 | 0.000              | 100.00% | retain |
| D1.4 Examination Scores for TCM Appropriate Techniques                                                                                   | 4.87 | 0.516 | 0.106              | 93.33%  | retain |
| D1.5 Pass Rate of Graduation Examination                                                                                                 | 4.67 | 0.617 | 0.132              | 93.33%  | modify |
| D2.1 Work Attitude                                                                                                                       | 4.80 | 0.561 | 0.117              | 93.33%  | retain |
| D2.2 Syndrome Differentiation - based Nursing                                                                                            | 4.80 | 0.561 | 0.117              | 93.33%  | retain |
| D2.3 The ability to inherit traditional Chinese medicine culture                                                                         | 4.73 | 0.594 | 0.126              | 93.33%  | modify |
| D2.4 Teaching Ability (Teaching, Tutoring, Training, and Professional Guidance)                                                          | 4.60 | 0.632 | 0.137              | 93.33%  | retain |
| D2.5 The proportion of published papers and patents                                                                                      | 4.13 | 0.915 | 0.222              | 80.00%  | modify |
| D2.6 Frequency of Participation in Continuing Education and Professional Development Activities for TCM Nursing by TCM specialist nurses | 4.60 | 0.632 | 0.137              | 93.33%  | retain |
| D2.7 Number of Adverse Events Related to TCM Nursing Operations after Training                                                           | 4.27 | 1.335 | 0.313 <sup>#</sup> | 73.33%  | modify |

---

**Supplementary File 4. Results of the First Round of Inquiry**

---

|                                                                                     |      |       |                    |        |        |
|-------------------------------------------------------------------------------------|------|-------|--------------------|--------|--------|
| D3.1 Patient Satisfaction                                                           | 4.53 | 0.640 | 0.141              | 93.33% | retain |
| D3.2 Satisfaction of leaders                                                        | 4.27 | 0.704 | 0.165              | 86.67% | modify |
| D3.3 Satisfaction of Colleagues                                                     | 4.40 | 0.632 | 0.144              | 93.33% | retain |
| D3.4 Self - satisfaction                                                            | 4.53 | 0.640 | 0.141              | 93.33% | retain |
| D3.5 Satisfaction of TCM culture inheritance                                        | 4.00 | 1.134 | 0.284 <sup>#</sup> | 73.33% | modify |
| D3.6 Promotion Rate of Position                                                     | 3.87 | 0.834 | 0.216              | 73.33% | modify |
| A3.1 Increasing Social Demand for Specialist Nurses in Traditional Chinese Medicine | —    | —     | —                  | —      | add    |
| A3.2 Relevant Policies Issued by the Government                                     | —    | —     | —                  | —      | add    |
| B4.4 Operating and Management Norms of Practice Bases                               | —    | —     | —                  | —      | add    |
| C1.4 Evaluation of the Advanced Nursing Practice Course                             | —    | —     | —                  | —      | add    |
| D2.2 Clinical Implementation Cases of TCM Nursing Techniques                        | —    | —     | —                  | —      | add    |
| D2.3 Outpatient Visits in TCM Nursing Clinics                                       | —    | —     | —                  | —      | add    |
| D2.4 Number of Outgoing Lecturers                                                   | —    | —     | —                  | —      | add    |
| D2.5 Number of Completed Cases of TCM Nursing Plans for Specialized Diseases        | —    | —     | —                  | —      | add    |

---

**Note: # indicates a coefficient of variation (CV) > 0.25.**

## Supplementary File 5.Results of the Second Round of Inquiry

### Results of the Second-Round Delphi Survey

#### 1.1 First Level Indicators

**Table S5.1** Results of the Second-Round Delphi Survey on Primary Indicators

| First Level Indicators | The mean importance scores | Standard deviation of importance score | CV    | Agreement rate | Results |
|------------------------|----------------------------|----------------------------------------|-------|----------------|---------|
| A.Context evaluation   | 4.87                       | 0.352                                  | 0.072 | 100.00%        | retain  |
| B.Input Evaluation     | 4.80                       | 0.414                                  | 0.086 | 100.00%        | retain  |
| C.Process evaluation   | 4.93                       | 0.258                                  | 0.052 | 100.00%        | retain  |
| D.Product evaluation   | 5.00                       | 0.000                                  | 0.000 | 100.00%        | retain  |

#### 1.2 Second Level Indicators

**Table S5.2** Results of the Second-Round Delphi Survey on Secondary Indicators

| Second Level Indicators           | The mean importance scores | Standard deviation of importance score | CV    | Agreement rate | Results |
|-----------------------------------|----------------------------|----------------------------------------|-------|----------------|---------|
| A1 Training Needs                 | 4.80                       | 0.561                                  | 0.117 | 93.33%         | retain  |
| A2 Training Objectives            | 4.87                       | 0.516                                  | 0.106 | 93.33%         | retain  |
| A3 Industry and Policy Background | 5.00                       | 0.000                                  | 0.000 | 100.00%        | retain  |
| B1 Curriculum Construction        | 4.93                       | 0.258                                  | 0.052 | 100.00%        | retain  |
| B2 Teaching Conditions            | 4.93                       | 0.258                                  | 0.052 | 100.00%        | retain  |
| B3 Faculty Team                   | 4.93                       | 0.258                                  | 0.052 | 100.00%        | retain  |
| B4 Rules and Regulations          | 4.93                       | 0.258                                  | 0.052 | 100.00%        | retain  |
| B5 Management Mechanism           | 4.87                       | 0.352                                  | 0.072 | 100.00%        | retain  |
| C1 Training Content               | 4.87                       | 0.516                                  | 0.106 | 93.33%         | retain  |
| C2 Teaching Evaluation            | 4.87                       | 0.516                                  | 0.106 | 93.33%         | retain  |
| C3 Learning Layer Evaluation      | 4.93                       | 0.258                                  | 0.052 | 100.00%        | retain  |
| D1 Behavioral Layer Evaluation    | 4.87                       | 0.352                                  | 0.072 | 100.00%        | retain  |

## Supplementary File 5. Results of the Second Round of Inquiry

|                  |                 |      |       |       |         |        |
|------------------|-----------------|------|-------|-------|---------|--------|
| D2<br>Evaluation | Result<br>Layer | 5.00 | 0.000 | 0.000 | 100.00% | retain |
|------------------|-----------------|------|-------|-------|---------|--------|

### 1.3 Third Level Indicators

**Revisions(n=3):** Experts suggested that “A1.2 Training Needs for Traditional Chinese Medicine (TCM) Specialist Nurses” was not clear enough. After discussion, the research team decided that training needs under the background evaluation should be preparatory for the training. Therefore, the general “meeting the training needs of TCM specialist nurses” was split into five dimensions: knowledge, skills, resources, mentorship, and policies, covering the complete chain of job needs. “A1.1 Meeting the TCM Basic Theory or Skills Training Needs” was revised to “A1.1 TCM Specialist Nursing Knowledge Training Needs” and “A1.2 TCM Specialist Nursing Skills Training Needs.” “A1.2 Meeting the TCM Specialist Nurse Job Training Needs” was revised to “A1.3 Rational Allocation of Clinical Practice Base Resources,” “A1.4 Clinical Mentorship Models and Effectiveness Needs,” and “A1.5 TCM Nursing Policies and Standards Training Needs.” Experts recommended adding a feasibility assessment regarding the support level from training project leaders and funding. After discussion, “A3.2 National Policies in Place” was revised to “A3.2 Government Policies in Place” and “A3.3 Availability of Funding Support for Training Projects.”

**Reordering(n=3):** The order of “A1 Training Needs, A2 Training Objectives, A3 Industry and Policy Background” was adjusted to “A1 Industry and Policy Background, A2 Training Needs, A3 Training Objectives,” along with the corresponding reordering of tertiary indicators.

**Table S5.3** Results of the Second-Round Delphi Survey on Tertiary Indicators

| Third Level Indicators                                                              | The mean importance scores | Standard deviation of importance score | CV    | Agreement rate | Results |
|-------------------------------------------------------------------------------------|----------------------------|----------------------------------------|-------|----------------|---------|
| A1.1 Basic Training Needs in Traditional Chinese Medicine                           | 4.93                       | 0.258                                  | 0.052 | 100.00%        | modify  |
| A1.2 Training Needs for Specialist Nurse Positions in Traditional Chinese Medicine  | 4.80                       | 0.561                                  | 0.117 | 93.33%         | modify  |
| A2.1 Overall Training Objectives                                                    | 4.80                       | 0.561                                  | 0.117 | 93.33%         | retain  |
| A2.2 Stage - specific Training Objectives                                           | 4.87                       | 0.516                                  | 0.106 | 93.33%         | retain  |
| A2.3 Specialized Training Objectives                                                | 4.87                       | 0.516                                  | 0.106 | 93.33%         | retain  |
| A3.1 Increasing Social Demand for Specialist Nurses in Traditional Chinese Medicine | 4.80                       | 0.414                                  | 0.086 | 100.00%        | retain  |
| A3.2 Relevant Policies Issued by the Government                                     | 4.80                       | 0.414                                  | 0.086 | 100.00%        | modify  |
| B1.1 Degree of Match between Course Objectives and Training Objectives              | 4.80                       | 0.561                                  | 0.117 | 93.33%         | retain  |
| B1.2 Rationality of Course Arrangement                                              | 4.73                       | 0.594                                  | 0.126 | 93.33%         | retain  |

**Supplementary File 5.Results of the Second Round of Inquiry**

|                                                                                          |      |       |       |         |        |
|------------------------------------------------------------------------------------------|------|-------|-------|---------|--------|
| B1.3 Clinical Rotation Plan and Standards                                                | 4.73 | 0.594 | 0.126 | 93.33%  | retain |
| B1.4 Training Methods (Applicability and Diversity)                                      | 4.80 | 0.561 | 0.117 | 93.33%  | retain |
| B1.5 Assessment Methods (Applicability and Diversity)                                    | 4.67 | 0.617 | 0.132 | 93.33%  | retain |
| B2.1 Emergency Response Plan Development                                                 | 4.13 | 0.834 | 0.202 | 73.33%  | retain |
| B2.2 Teaching Facilities and Equipment                                                   | 4.53 | 0.640 | 0.141 | 93.33%  | retain |
| B2.3 Library Resources and Electronic Information Resources                              | 4.13 | 0.834 | 0.202 | 73.33%  | retain |
| B2.4 Teaching Management Level                                                           | 4.80 | 0.561 | 0.117 | 93.33%  | retain |
| B3.1 Teaching Quality (Teaching Attitude and Skills)                                     | 4.87 | 0.516 | 0.106 | 93.33%  | retain |
| B3.2 Teaching Ability                                                                    | 4.87 | 0.516 | 0.106 | 93.33%  | retain |
| B3.3 Practical Skills Level of Supervising Teachers                                      | 4.87 | 0.516 | 0.106 | 93.33%  | retain |
| B3.4 Professional Title Structure and Proportion                                         | 4.27 | 0.884 | 0.207 | 73.33%  | retain |
| B3.5 Educational Level Structure and Proportion                                          | 4.33 | 0.900 | 0.208 | 73.33%  | retain |
| B3.6 Ratio of Teachers to Students                                                       | 4.67 | 0.617 | 0.132 | 93.33%  | retain |
| B4.1 Management Regulations for Training Fees                                            | 3.93 | 0.704 | 0.179 | 73.33%  | retain |
| B4.2 Regulations for Training Time Arrangement and Scheduling                            | 4.53 | 0.743 | 0.164 | 86.67%  | retain |
| B4.3 Management and Assessment Standards for Training Attendance                         | 4.73 | 0.704 | 0.149 | 86.67%  | retain |
| B4.4 Operating and Management Norms of Practice Bases                                    | 4.87 | 0.516 | 0.106 | 93.33%  | retain |
| B4.5 Clinical Supervision System                                                         | 4.80 | 0.561 | 0.117 | 93.33%  | retain |
| B5.1 Sound Organization Structure                                                        | 3.93 | 0.799 | 0.203 | 73.33%  | retain |
| B5.2 Feedback and Suggestion Mechanism                                                   | 4.80 | 0.561 | 0.117 | 93.33%  | retain |
| B5.3 Continuous Support for Traditional Chinese Nursing Education and Career Development | 4.67 | 0.617 | 0.132 | 93.33%  | retain |
| C1.1 Evaluation of the Nursing Laws and Regulations Course                               | 4.67 | 0.617 | 0.132 | 93.33%  | retain |
| C1.2 Evaluation of the Theory Knowledge Course for TCM Nursing Specialization            | 5.00 | 0.000 | 0.000 | 100.00% | retain |
| C1.3 Evaluation of the Nursing Practice Skills Course for TCM Nursing Specialization     | 5.00 | 0.000 | 0.000 | 100.00% | retain |

## Supplementary File 5. Results of the Second Round of Inquiry

|                                                                                                                                          |      |       |       |         |        |
|------------------------------------------------------------------------------------------------------------------------------------------|------|-------|-------|---------|--------|
| C1.4 Evaluation of the Advanced Nursing Practice Course                                                                                  | 4.80 | 0.561 | 0.117 | 93.33%  | retain |
| C1.5 Evaluation of the Research Course                                                                                                   | 4.80 | 0.561 | 0.117 | 93.33%  | retain |
| C2.1 Evaluation of Teaching Supervision                                                                                                  | 4.80 | 0.414 | 0.086 | 100.00% | retain |
| C2.2 Feedback Evaluation from TCM specialist nurses                                                                                      | 4.93 | 0.258 | 0.052 | 100.00% | retain |
| C2.3 Peer Evaluation among Teachers                                                                                                      | 4.33 | 0.816 | 0.188 | 80.00%  | retain |
| C2.4 Classroom Participation                                                                                                             | 4.80 | 0.561 | 0.117 | 93.33%  | retain |
| C2.5 Implementation of Feedback Loop                                                                                                     | 4.87 | 0.516 | 0.106 | 93.33%  | retain |
| C3.1 Attendance Rate                                                                                                                     | 4.40 | 0.632 | 0.144 | 93.33%  | retain |
| C3.2 Theory Examination Scores                                                                                                           | 5.00 | 0.000 | 0.000 | 100.00% | retain |
| C3.3 Examination Scores for TCM Appropriate Techniques                                                                                   | 5.00 | 0.000 | 0.000 | 100.00% | retain |
| C3.4 Completion Number of Group Plans                                                                                                    | 4.87 | 0.516 | 0.106 | 93.33%  | retain |
| C3.5 Number of Nursing Cases Completed                                                                                                   | 4.87 | 0.516 | 0.106 | 93.33%  | retain |
| C3.6 Pass Rate of TCM Specialist Nurses' Graduation Examination                                                                          | 4.53 | 0.640 | 0.141 | 93.33%  | retain |
| D1.1 Work Attitude                                                                                                                       | 4.87 | 0.516 | 0.106 | 93.33%  | retain |
| D1.2 Syndrome Differentiation - based Nursing                                                                                            | 4.87 | 0.516 | 0.106 | 93.33%  | retain |
| D1.3 Ability in Handling Difficult and Critical Cases                                                                                    | 4.87 | 0.516 | 0.106 | 93.33%  | retain |
| D1.4 TCM Health Education                                                                                                                | 4.87 | 0.352 | 0.072 | 100.00% | retain |
| D1.5 Clinical Critical Thinking Ability in TCM                                                                                           | 5.00 | 0.000 | 0.000 | 100.00% | retain |
| D1.6 Teaching Ability (Teaching, Tutoring, Training, and Professional Guidance)                                                          | 4.80 | 0.561 | 0.117 | 93.33%  | retain |
| D1.7 Frequency of Participation in Continuing Education and Professional Development Activities for TCM Nursing by TCM specialist nurses | 4.73 | 0.594 | 0.126 | 93.33%  | retain |
| D1.8 Number of Adverse Events Related to TCM Nursing Operations by TCM specialist nurses after Training                                  | 4.67 | 0.900 | 0.193 | 86.67%  | retain |
| D2.1 Patient Satisfaction                                                                                                                | 4.80 | 0.561 | 0.117 | 93.33%  | retain |
| D2.2 Clinical Implementation Cases of TCM Nursing Techniques                                                                             | 5.00 | 0.000 | 0.000 | 100.00% | retain |
| D2.3 Outpatient Visits in TCM Nursing Clinics                                                                                            | 5.00 | 0.000 | 0.000 | 100.00% | retain |
| D2.4 Number of Outgoing Lecturers                                                                                                        | 4.93 | 0.258 | 0.052 | 100.00% | retain |
| D2.5 Number of Completed Cases of TCM Nursing Plans for Specialized                                                                      | 4.93 | 0.258 | 0.052 | 100.00% | retain |

## Supplementary File 5. Results of the Second Round of Inquiry

### Diseases

|                                                     |      |       |       |        |        |
|-----------------------------------------------------|------|-------|-------|--------|--------|
| D2.6 Proportion of Published Papers                 | 4.47 | 0.640 | 0.143 | 93.33% | retain |
| D2.7 Proportion of Project Applications             | 4.47 | 0.640 | 0.143 | 93.33% | retain |
| D2.8 Proportion of Obtained Patents                 | 4.47 | 0.640 | 0.143 | 93.33% | retain |
| D2.9 Satisfaction of the Original Unit's Department | 4.27 | 0.799 | 0.187 | 80.00% | retain |
| D2.10 Satisfaction of Colleagues                    | 4.20 | 0.676 | 0.161 | 86.67% | retain |
| D2.11 Self - satisfaction                           | 4.80 | 0.561 | 0.117 | 93.33% | retain |
| D2.12 Satisfaction of TCM Health Education          | 4.13 | 0.640 | 0.155 | 86.67% | retain |
| D2.13 Promotion Rate of Position                    | 4.33 | 0.816 | 0.188 | 80.00% | retain |

---

# Supplementary Figure S1.(Round 1)Questionnaire

## Questionnaire for Screening Evaluation Indicators of Training Effects for Specialist Nurses in Traditional Chinese Medicine Based on the CIPP Model and Kirkpatrick Model (Round 1)

Dear Experts,

Hello! In view of your extensive academic achievements and practical experience in this field of research, we cordially invite you to participate in the first round of expert consultation in this study. Your valuable comments will help us to identify the indicators, and we hope that you can give us guidance for our research. Based on the theoretical framework of CIPP model and Kirkwall model, this study constructs an evaluation index system for the training effect of Traditional Chinese Medicine (TCM) specialist nurses that conforms to the development of the discipline and meets the clinical needs, in order to provide a reference for the evaluation of the training effect of TCM specialist nurses and promote the continuous improvement of the training quality of TCM specialist nurses.

The CIPP model consists of four evaluation stages: Context, Input, Process and Product. Kirkpatrick model is used to evaluate the effect of training activities and test whether the expected goal is achieved. It mainly includes four dimensions: reaction layer, learning layer, behavior layer and result layer. CIPP model emphasizes the evaluation of the whole training process, but the descriptive evaluation is more, and the outcome level evaluation is not subdivided into content and level. Kirkpatrick model pays more attention to the evaluation of the effect after training, but lacks the evaluation of the pre-training and training process. This study combined the application of CIPP model and Kirkpatrick model, combined the reaction layer of Kirkpatrick model with the process evaluation of CIPP model, and the result evaluation combined with the learning layer, behavior layer and result layer of Kirkpatrick model, so as to achieve the scientific and comprehensive evaluation.

Thank you for your guidance and help in your busy schedule! We would appreciate your reply within 7 days. If you have any questions about the questionnaire, please feel free to contact us.

**Contact Person: Qi Yanhuan (Instructor: Zhong Yinqin)**

**Contact Number: 13670090629**

**Email: 914560662@qq.com**

**Contact Unit: Shenzhen Hospital of Guangzhou University of Chinese Medicine (Futian)  
Part I Expert consultation form**

The preliminary evaluation index framework included 4 first-level indicators, 12 second-level indicators and 57 third-level indicators. After the research group discussion, the expert consultation table was finally formed. The consultation content included whether the indicators were scientific, the importance of indicators; What you need to change, add, and delete. The importance of indicators is expressed by Likert5 scoring method: "5= very important, 4= important, 3= generally important, 2= not important, 1= very unimportant", please mark "√" on the corresponding value.

Table 1 First - level Indicator Consultation Form

| First - level Indicator | Indicator Explanation                                | Importance Level                                                                                       | Modification Suggestions |
|-------------------------|------------------------------------------------------|--------------------------------------------------------------------------------------------------------|--------------------------|
|                         |                                                      | 5 = very important, 4 = important, 3 = moderately important, 2 = not very important, 1 = not important |                          |
| A Context Evaluation    | Analyze and determine training needs and objectives  |                                                                                                        |                          |
| B Input Evaluation      | Evaluate the software and hardware inputs of trainin |                                                                                                        |                          |
| C Process Evaluation    | Track the implementation process of the plan         |                                                                                                        |                          |
| D Product Evaluation    | Evaluate the impact of training                      |                                                                                                        |                          |
| Other Suggestions:      |                                                      |                                                                                                        |                          |

Table 2 Second - level Indicator Consultation Form

| First - level Indicator                               | Second - level Indicator       | Importance Level                                                                                       | Modification Suggestions |
|-------------------------------------------------------|--------------------------------|--------------------------------------------------------------------------------------------------------|--------------------------|
|                                                       |                                | 5 = very important, 4 = important, 3 = moderately important, 2 = not very important, 1 = not important |                          |
| Context Evaluation                                    | A1 Training Needs              |                                                                                                        |                          |
|                                                       | A2 Training Objectives         |                                                                                                        |                          |
| Input Evaluation                                      | B1 Curriculum Construction     |                                                                                                        |                          |
|                                                       | B2 Teaching Conditions         |                                                                                                        |                          |
|                                                       | B3 Faculty Team                |                                                                                                        |                          |
|                                                       | B4 Rules and Regulations       |                                                                                                        |                          |
|                                                       | B5 Management Mechanism        |                                                                                                        |                          |
| Process Evaluation                                    | C1 Training Content            |                                                                                                        |                          |
|                                                       | C2 Quality assurance           |                                                                                                        |                          |
| Product Evaluation                                    | D1 Learning Layer Evaluation   |                                                                                                        |                          |
|                                                       | D2 Behavioral Layer Evaluation |                                                                                                        |                          |
|                                                       | D3 Result Layer Evaluation     |                                                                                                        |                          |
| Second - level Indicators You Think Need to Be Added: |                                |                                                                                                        |                          |



## Supplementary Figure S1.(Round 1)Questionnaire

| First - level Indicator                              | Second - level Indicator | Third - level Indicator         | Importance Level                                                                                       |  |  |  |  | Modification Suggestions |
|------------------------------------------------------|--------------------------|---------------------------------|--------------------------------------------------------------------------------------------------------|--|--|--|--|--------------------------|
|                                                      |                          |                                 | 5 = very important, 4 = important, 3 = moderately important, 2 = not very important, 1 = not important |  |  |  |  |                          |
|                                                      |                          | inheritance                     |                                                                                                        |  |  |  |  |                          |
|                                                      |                          | D3.6 Promotion Rate of Position |                                                                                                        |  |  |  |  |                          |
| Third - level Indicators You Think Need to Be Added: |                          |                                 |                                                                                                        |  |  |  |  |                          |

### Part 2 Expert Information Survey Form

((Your information is only used for us to study the authority of experts, and we will keep it strictly confidential!))

Please fill in your information in the corresponding columns or mark "√" in the corresponding option numbers.

|                          |                                               |                    |  |                                        |  |                                    |  |
|--------------------------|-----------------------------------------------|--------------------|--|----------------------------------------|--|------------------------------------|--|
| Initials of Name         |                                               | Gender             |  | Age                                    |  | Highest Academic Degree            |  |
| Work Unit                |                                               | Professional Title |  | Position                               |  | Positions in Industry Associations |  |
| Research Direction       |                                               | Specialty          |  | Number of Years Engaged in TCM (years) |  |                                    |  |
| Preferred Contact Method | Contact Phone Number<br>E-mail:<br>QQ/Wechat: |                    |  |                                        |  |                                    |  |

### Part 3 Expert self-evaluation form

1. Your familiarity with the content of the form :

|                                       |                                        |                                   |                                          |                                        |                                     |
|---------------------------------------|----------------------------------------|-----------------------------------|------------------------------------------|----------------------------------------|-------------------------------------|
| How familiar you are with the content | <input type="checkbox"/> very familiar | <input type="checkbox"/> familiar | <input type="checkbox"/> fairly familiar | <input type="checkbox"/> less familiar | <input type="checkbox"/> unfamiliar |
|---------------------------------------|----------------------------------------|-----------------------------------|------------------------------------------|----------------------------------------|-------------------------------------|

2. The judgment basis for your choice of the importance of the index (Note: the following four aspects may affect your judgment of the index, and the influence of each aspect on your judgment can be divided into three degrees: large, medium and small) :

| Judgment Basis        | Influence degree                                                                              |
|-----------------------|-----------------------------------------------------------------------------------------------|
| Work experience       | <input type="checkbox"/> Large <input type="checkbox"/> Medium <input type="checkbox"/> Small |
| Theoretical analysis  | <input type="checkbox"/> Large <input type="checkbox"/> Medium <input type="checkbox"/> Small |
| Reference             | <input type="checkbox"/> Large <input type="checkbox"/> Medium <input type="checkbox"/> Small |
| Intuitionistic choice | <input type="checkbox"/> Large <input type="checkbox"/> Medium <input type="checkbox"/> Small |

**Thank you again, wish you a happy life! Good health! Good work!**

# Supplementary Figure S2.Results of the Second Round of Inquiry

## Questionnaire for Screening Evaluation Indicators of Training Effects for Specialist Nurses in Traditional Chinese Medicine Based on the CIPP Model and Kirkpatrick Model (Round 2)

Dear Expert:

Greetings! With your strong support, the first - round expert consultation of the "Questionnaire for Screening Evaluation Indicators of Training Effects for Specialist Nurses in Traditional Chinese Medicine Based on the CIPP Model and Kirkpatrick Model" was successfully completed. We sincerely appreciate the help and guidance you provided during the first - round inquiry! A total of 16 experts participated in the first - round expert consultation of this study, and 15 valid questionnaires were retrieved. Based on the valuable suggestions put forward by the experts, the research team members sorted and summarized them. When the arithmetic mean of the importance of an item is > 3.5 and the coefficient of variation is < 25%, it indicates that the indicator has a good correlation with the measured content. Considering the actual situation of the project, after collective evaluation and discussion by the coordination team, the second - round expert consultation questionnaire was formed. This second - round expert consultation questionnaire consists of two parts. The first part is the consultation form for evaluation indicators of the training effects of specialist nurses in Traditional Chinese Medicine, and the second part is the survey form for experts' basic information. Now, we sincerely invite you to evaluate the revised content again. If you have any questions about the issues involved in the questionnaire, please feel free to contact us.

Thank you again for your guidance and help in your busy schedule! We would be extremely grateful if you could reply within 7 days. We wish you every success in your work and good health!

Contact Person: Qi Yanhuan (Instructor: Zhong Yanqin)

Contact Number: 13670090629

Email: 91456062@qq.com

Contact Unit: Shenzhen Hospital of Guangzhou University of Chinese Medicine (Futian)

### Part 1 Expert Consultation Form

Based on the valuable suggestions put forward by the experts in the first - round inquiry, the research team members sorted and summarized them, and formed an evaluation index framework, including 4 first - level indicators, 13 second - level indicators, and 67 third - level indicators. After discussion by the research team, the expert consultation form was finally formed. The consultation content includes the scientific nature of the indicators, the importance of the indicators, and the content you think needs to be modified, added, or deleted. The importance of the indicators is represented by the Likert 5 - level scoring method: "5 = very important, 4 = important, 3 = moderately important, 2 = not very important, 1 = not important". Please select the corresponding value from the drop - down list.

Table 1 First - level Indicator Consultation Form

| First - level Indicator | Indicator Explanation                                 | Importance Level                                                                                       | Modification Suggestions |
|-------------------------|-------------------------------------------------------|--------------------------------------------------------------------------------------------------------|--------------------------|
|                         |                                                       | 5 = very important, 4 = important, 3 = moderately important, 2 = not very important, 1 = not important |                          |
| A Context Evaluation    | Analyze and determine training needs and objectives   |                                                                                                        |                          |
| B Input Evaluation      | Evaluate the software and hardware inputs of training |                                                                                                        |                          |
| C Process Evaluation    | Track the implementation process of the plan          |                                                                                                        |                          |
| D Product Evaluation    | Evaluate the impact of training                       |                                                                                                        |                          |
| Other Suggestions:      |                                                       |                                                                                                        |                          |

Table 2 Second - level Indicator Consultation Form

| First - level Indicator                               | Second - level Indicator          | Importance Level                                                                                       | Modification Suggestions |
|-------------------------------------------------------|-----------------------------------|--------------------------------------------------------------------------------------------------------|--------------------------|
|                                                       |                                   | 5 = very important, 4 = important, 3 = moderately important, 2 = not very important, 1 = not important |                          |
| Context Evaluation                                    | A1 Training Needs                 |                                                                                                        |                          |
|                                                       | A2 Training Objectives            |                                                                                                        |                          |
|                                                       | A3 Industry and Policy Background |                                                                                                        |                          |
| Input Evaluation                                      | B1 Curriculum Construction        |                                                                                                        |                          |
|                                                       | B2 Teaching Conditions            |                                                                                                        |                          |
|                                                       | B3 Faculty Team                   |                                                                                                        |                          |
|                                                       | B4 Rules and Regulations          |                                                                                                        |                          |
|                                                       | B5 Management Mechanism           |                                                                                                        |                          |
| Process Evaluation                                    | C1 Training Content               |                                                                                                        |                          |
|                                                       | C2 Teaching Evaluation            |                                                                                                        |                          |
|                                                       | C3 Learning Layer Evaluation      |                                                                                                        |                          |
| Product Evaluation                                    | D1 Behavioral Layer Evaluation    |                                                                                                        |                          |
|                                                       | D2 Result Layer Evaluation        |                                                                                                        |                          |
| Second - level Indicators You Think Need to Be Added: |                                   |                                                                                                        |                          |

Table 3 Third - level Indicator Consultation Form

| First - level Indicator                                                                  | Second - level Indicator          | Third - level Indicator                                                             | Importance Level                                                                                       | Modification Suggestions |
|------------------------------------------------------------------------------------------|-----------------------------------|-------------------------------------------------------------------------------------|--------------------------------------------------------------------------------------------------------|--------------------------|
|                                                                                          |                                   |                                                                                     | 5 = very important, 4 = important, 3 = moderately important, 2 = not very important, 1 = not important |                          |
| A Context Evaluation                                                                     | A1 Training Needs                 | A1.1 Basic Training Needs in Traditional Chinese Medicine                           |                                                                                                        | C1                       |
|                                                                                          |                                   | A1.2 Training Needs for Specialist Nurse Positions in Traditional Chinese Medicine  |                                                                                                        | C2                       |
|                                                                                          | A2 Training Objectives            | A2.1 Overall Training Objectives                                                    |                                                                                                        | C3                       |
|                                                                                          |                                   | A2.2 Stage - specific Training Objectives                                           |                                                                                                        | C4                       |
|                                                                                          |                                   | A2.3 Specialized Training Objectives                                                |                                                                                                        | C5                       |
|                                                                                          | A3 Industry and Policy Background | A3.1 Increasing Social Demand for Specialist Nurses in Traditional Chinese Medicine |                                                                                                        | C6                       |
|                                                                                          |                                   | A3.2 Relevant Policies Issued by the Government                                     |                                                                                                        | C7                       |
| Third - level Indicators You Think Need to Be Added:                                     |                                   |                                                                                     |                                                                                                        |                          |
| B Input Evaluation                                                                       | B1 Curriculum Construction        | B1.1 Degree of Match between Course Objectives and Training Objectives              |                                                                                                        | C8                       |
|                                                                                          |                                   | B1.2 Rationality of Course Arrangement                                              |                                                                                                        | C9                       |
|                                                                                          |                                   | B1.3 Clinical Rotation Plan and Standards                                           |                                                                                                        | C10                      |
|                                                                                          |                                   | B1.4 Training Methods (Applicability and Diversity)                                 |                                                                                                        | C11                      |
|                                                                                          |                                   | B1.5 Assessment Methods (Applicability and Diversity)                               |                                                                                                        | C12                      |
|                                                                                          |                                   | B1.6 Emergency Response Plan Development                                            |                                                                                                        | C13                      |
|                                                                                          | B2 Teaching Conditions            | B2.1 Teaching Facilities and Equipment                                              |                                                                                                        | C14                      |
|                                                                                          |                                   | B2.2 Library Resources and Electronic Information Resources                         |                                                                                                        | C15                      |
|                                                                                          |                                   | B2.4 Teaching Management Level                                                      |                                                                                                        | C16                      |
|                                                                                          | B3 Faculty Team                   | B3.1 Teaching Quality (Teaching Attitude and Skills)                                |                                                                                                        | C17                      |
|                                                                                          |                                   | B3.2 Teaching Ability                                                               |                                                                                                        | C18                      |
|                                                                                          |                                   | B3.3 Practical Skills Level of Supervising Teachers                                 |                                                                                                        | C19                      |
|                                                                                          |                                   | B3.4 Professional Title Structure and Proportion                                    |                                                                                                        | C20                      |
|                                                                                          |                                   | B3.5 Educational Level Structure and Proportion                                     |                                                                                                        | C21                      |
|                                                                                          |                                   | B3.6 Ratio of Teachers to Students                                                  |                                                                                                        | C22                      |
|                                                                                          | B4 Rules and Regulations          | B4.1 Management Regulations for Training Fees                                       |                                                                                                        | C23                      |
|                                                                                          |                                   | B4.2 Regulations for Training Time Arrangement and Scheduling                       |                                                                                                        | C24                      |
|                                                                                          |                                   | B4.3 Management and Assessment Standards for Training Attendance                    |                                                                                                        | C25                      |
|                                                                                          |                                   | B4.4 Operating and Management Norms of Practice Bases                               |                                                                                                        | C26                      |
|                                                                                          |                                   | B4.5 Clinical Supervision System                                                    |                                                                                                        | C27                      |
|                                                                                          | B5 Management Mechanism           | B5.1 Sound Organization Structure                                                   |                                                                                                        | C28                      |
| B5.2 Feedback and Suggestion Mechanism                                                   |                                   |                                                                                     | C29                                                                                                    |                          |
| B5.3 Continuous Support for Traditional Chinese Nursing Education and Career Development |                                   |                                                                                     | C30                                                                                                    |                          |

## Supplementary Figure S2.Results of the Second Round of Inquiry

|                                                                 |                                |                                                                                                                                          |  |  |     |     |     |
|-----------------------------------------------------------------|--------------------------------|------------------------------------------------------------------------------------------------------------------------------------------|--|--|-----|-----|-----|
|                                                                 | B5 Management Mechanism        | B5.2 Feedback and Suggestion Mechanism                                                                                                   |  |  | C29 |     |     |
|                                                                 |                                | B5.3 Continuous Support for Traditional Chinese Nursing Education and Career Development                                                 |  |  | C30 |     |     |
|                                                                 |                                | Third - level Indicators You Think Need to Be Added:                                                                                     |  |  |     |     |     |
| C Process Evaluation                                            | C1 Training Content            | C1.1 Evaluation of the Nursing Laws and Regulations Course                                                                               |  |  | C31 |     |     |
|                                                                 |                                | C1.2 Evaluation of the Theory Knowledge Course for TCM Nursing Specialization                                                            |  |  | C32 |     |     |
|                                                                 |                                | C1.3 Evaluation of the Nursing Practice Skills Course for TCM Nursing Specialization                                                     |  |  | C33 |     |     |
|                                                                 |                                | C1.4 Evaluation of the Advanced Nursing Practice Course                                                                                  |  |  | C34 |     |     |
|                                                                 |                                | C1.5 Evaluation of the Research Course                                                                                                   |  |  | C35 |     |     |
|                                                                 | C2 Teaching Evaluation         | C2.1 Evaluation of Teaching Supervision                                                                                                  |  |  |     | C36 |     |
|                                                                 |                                | C2.2 Feedback Evaluation from TCM specialist nurses                                                                                      |  |  |     | C37 |     |
|                                                                 |                                | C2.3 Peer Evaluation among Teachers                                                                                                      |  |  |     | C38 |     |
|                                                                 |                                | C2.4 Classroom Participation                                                                                                             |  |  |     | C39 |     |
|                                                                 |                                | C2.5 Implementation of Feedback Loop                                                                                                     |  |  |     | C40 |     |
|                                                                 | C3 Learning Layer Evaluation   | C3.1 Attendance Rate                                                                                                                     |  |  |     | C41 |     |
|                                                                 |                                | C3.2 Theory Examination Scores                                                                                                           |  |  |     | C42 |     |
|                                                                 |                                | C3.3 Examination Scores for TCM Appropriate Techniques                                                                                   |  |  |     | C43 |     |
|                                                                 |                                | C3.4 Completion Number of Group Plans                                                                                                    |  |  |     | C44 |     |
|                                                                 |                                | C3.5 Number of Nursing Cases Completed                                                                                                   |  |  |     | C45 |     |
| C3.6 Pass Rate of TCM Specialist Nurses' Graduation Examination |                                |                                                                                                                                          |  |  | C46 |     |     |
|                                                                 |                                | Third - level Indicators You Think Need to Be Added:                                                                                     |  |  |     |     |     |
| D Product Evaluation                                            | D1 Behavioral Layer Evaluation | D1.1 Work Attitude                                                                                                                       |  |  |     | C47 |     |
|                                                                 |                                | D1.2 Competency in Syndrome Differentiation Nursing                                                                                      |  |  |     | C48 |     |
|                                                                 |                                | D1.3 Ability in Handling Difficult and Critical Cases                                                                                    |  |  |     | C49 |     |
|                                                                 |                                | D1.4 TCM Health Education                                                                                                                |  |  |     | C50 |     |
|                                                                 |                                | D1.5 Clinical Critical Thinking Ability in TCM                                                                                           |  |  |     | C51 |     |
|                                                                 |                                | D1.6 Teaching Ability (Teaching, Tutoring, Training, and Professional Guidance)                                                          |  |  |     | C52 |     |
|                                                                 |                                | D1.7 Frequency of Participation in Continuing Education and Professional Development Activities for TCM Nursing by TCM specialist nurses |  |  |     | C53 |     |
|                                                                 |                                | D1.8 Number of Adverse Events Related to TCM Nursing Operations by TCM specialist nurses after Training                                  |  |  |     | C54 |     |
|                                                                 | D2 Result Layer Evaluation     | D2.1 Patient Satisfaction                                                                                                                |  |  |     |     | C55 |
|                                                                 |                                | D2.2 Clinical Implementation Cases of TCM Nursing Techniques                                                                             |  |  |     |     | C56 |
|                                                                 |                                | D2.3 Outpatient Visits in TCM Nursing Clinics                                                                                            |  |  |     |     | C57 |
|                                                                 |                                | D2.4 Number of Outgoing Lecturers                                                                                                        |  |  |     |     | C58 |
|                                                                 |                                | D2.5 Number of Completed Cases of TCM Nursing Plans for Specialized Diseases                                                             |  |  |     |     | C59 |
|                                                                 |                                | D2.6 Proportion of Published Papers                                                                                                      |  |  |     |     | C60 |
|                                                                 |                                | D2.7 Proportion of Project Applications                                                                                                  |  |  |     |     | C61 |
|                                                                 |                                | D2.8 Proportion of Obtained Patents                                                                                                      |  |  |     |     | C62 |
|                                                                 |                                | D2.9 Satisfaction of the Original Unit's Department                                                                                      |  |  |     |     | C63 |
|                                                                 |                                | D2.10 Satisfaction of Colleagues                                                                                                         |  |  |     |     | C64 |
|                                                                 |                                | D2.11 Self - satisfaction                                                                                                                |  |  |     |     | C65 |
|                                                                 |                                | D2.12 Satisfaction of TCM Health Education                                                                                               |  |  |     |     | C66 |
| D2.13 Promotion Rate of Position                                |                                |                                                                                                                                          |  |  | C67 |     |     |
|                                                                 |                                | Third - level Indicators You Think Need to Be Added:                                                                                     |  |  |     |     |     |

### Part 2 Expert Information Survey Form

**(Your information is only used for us to study the authority of experts, and we will keep it strictly confidential!)**

**Please fill in your information in the corresponding columns or mark "√" in the corresponding option numbers.**

|                          |                                                |                    |  |     |                                                   |                  |                       |
|--------------------------|------------------------------------------------|--------------------|--|-----|---------------------------------------------------|------------------|-----------------------|
| Initials of Name         |                                                | Gender             |  | Age |                                                   | Highest Academic |                       |
| Work Unit                |                                                | Professional Title |  |     | Position                                          |                  | Positions in Industry |
| Research Direction       |                                                | Specialty          |  |     | Number of Years Engaged in this Specialty (years) |                  |                       |
| Preferred Contact Method | Contact Phone Number<br>E-mail :<br>QQ/Wechat: |                    |  |     |                                                   |                  |                       |
